# Supplementary material for: First Draft Genome of the Trypanosomatid Herpetomonas muscarum ingenoplastis through MinION Oxford Nanopore Technology and Illumina Sequencing
Source: Trop Med Infect Dis. 2020 Feb 13;5(1):25. doi: 10.3390/tropicalmed5010025 (PMC7157233; doi:10.3390/tropicalmed5010025)
Supplement: Supplementary file 1 [file tropicalmed-05-00025-s001.xlsx]

## Sheet: Planilha1
Putative protein list based on the automated annotation by Companion, using Leishmania major as reference.
ingenoplastis_000005000.1 hypothetical protein, conserved
ingenoplastis_000005100.1 hypothetical protein, conserved
ingenoplastis_000005200.1 hypothetical protein, conserved
ingenoplastis_000005300.1 hypothetical protein, conserved
ingenoplastis_000005400.1 hypothetical protein, conserved
ingenoplastis_000005500.1 Phage integrase family, putative
ingenoplastis_000005600.1 hypothetical protein, conserved
ingenoplastis_000005700.1 hypothetical protein, conserved
ingenoplastis_000005800.1 Reverse transcriptase (RNA-dependent DNA polymerase), putative
ingenoplastis_000005900.1 Hsp70 protein, putative
ingenoplastis_000006000.1 Hsp70 protein, putative
ingenoplastis_000006300.1 hypothetical protein, conserved
ingenoplastis_000006400.1 Hsp70 protein, putative
ingenoplastis_000006800.1 hypothetical protein, conserved
ingenoplastis_000006900.1 heat shock protein 70, putative
ingenoplastis_000007000.1 hypothetical protein, conserved
ingenoplastis_000007100.1 hypothetical protein, conserved
ingenoplastis_000007200.1 cytosolic malate dehydrogenase
ingenoplastis_000007300.1 lactate/malate dehydrogenase, NAD binding domain/lactate/malate dehydrogenase, alpha/beta C-terminal domain containing protein, putative
ingenoplastis_000007400.1 60S ribosomal protein L14, putative
ingenoplastis_000007500.1 60S ribosomal protein L14, putative
ingenoplastis_000007600.1 dynein heavy chain, putative
ingenoplastis_000007700.1 hypothetical protein, conserved
ingenoplastis_000007800.1 oligomeric golgi complex component 8, putative
ingenoplastis_000007900.1 hypothetical protein
ingenoplastis_000008000.1 hypothetical protein, conserved
ingenoplastis_000008100.1 phosphate transporter, putative
ingenoplastis_000008200.1 hypothetical protein, conserved
ingenoplastis_000008300.1 U5 snRNP-specific 40 kDa protein, putative
ingenoplastis_000008400.1 hypothetical protein
ingenoplastis_000008500.1 hypothetical protein, conserved
ingenoplastis_000008600.1 hypothetical protein, conserved
ingenoplastis_000008700.1 serine/threonine kinase, putative
ingenoplastis_000008800.1 hypothetical protein
ingenoplastis_000009000.1 protein phosphatase 4 catalytic subunit, putative
ingenoplastis_000009200.1 molybdenum cofactor biosynthesis protein, putative
ingenoplastis_000009300.1 hypothetical protein
ingenoplastis_000009400.1 Coatomer subunit gamma
ingenoplastis_000009500.1 IQ calmodulin-binding motif containing protein, putative
ingenoplastis_000009600.1 hypothetical protein, conserved
ingenoplastis_000009700.1 leucine-rich repeat protein, putative
ingenoplastis_000009800.1 splicing factor 3B subunit 1, putative
ingenoplastis_000009900.1 hypothetical protein, conserved
ingenoplastis_000010000.1 40S ribosomal protein S17, putative
ingenoplastis_000010100.1 40S ribosomal protein S17, putative
ingenoplastis_000010300.1 R3H domain containing protein, putative
ingenoplastis_000010400.1 eukaryotic translation initiation factor 4E, putative
ingenoplastis_000010500.1 hypothetical protein
ingenoplastis_000010600.1 hypothetical protein
ingenoplastis_000010700.1 hypothetical protein
ingenoplastis_000010800.1 MRP protein-like protein
ingenoplastis_000010900.1 hypothetical protein, conserved
ingenoplastis_000011000.1 hypothetical protein, conserved
ingenoplastis_000011100.1 hypothetical protein, conserved
ingenoplastis_000011200.1 hypothetical protein, conserved
ingenoplastis_000011300.1 Endonuclease/Exonuclease/phosphatase family, putative
ingenoplastis_000011400.1 hypothetical protein, conserved
ingenoplastis_000011500.1 hypothetical protein, conserved
ingenoplastis_000011600.1 hypothetical protein, conserved
ingenoplastis_000011700.1 Endonuclease/Exonuclease/phosphatase family, putative
ingenoplastis_000011800.1 hypothetical protein, conserved
ingenoplastis_000012000.1 hypothetical protein, conserved
ingenoplastis_000012100.1 Putative serine esterase (DUF676), putative
ingenoplastis_000012200.1 hypothetical protein, conserved
ingenoplastis_000012300.1 Putative serine esterase (DUF676), putative
ingenoplastis_000012400.1 hypothetical protein, conserved
ingenoplastis_000012500.1 Vacuolar proton pump subunit B, putative
ingenoplastis_000012600.1 2-oxoglutarate dehydrogenase, E2 component, dihydrolipoamide succinyltransferase, putative
ingenoplastis_000012700.1 dolichyl-lipid chaperone, putative
ingenoplastis_000012800.1 hypothetical protein, conserved
ingenoplastis_000012900.1 protein phosphatase type 1 regulator-like protein
ingenoplastis_000013000.1 DNA replication licensing factor MCM6, putative
ingenoplastis_000013200.1 hypothetical protein, conserved
ingenoplastis_000013300.1 hypothetical protein, conserved
ingenoplastis_000013400.1 Cactus-binding C-terminus of cactin protein, putative
ingenoplastis_000013500.1 hypothetical protein
ingenoplastis_000013600.1 eukaryotic translation initiation factor, putative
ingenoplastis_000013700.1 hypothetical protein
ingenoplastis_000013800.1 hypothetical protein
ingenoplastis_000013900.1 Translation initiation factor eIF-2B subunit epsilon, putative
ingenoplastis_000014000.1 glycosomal membrane protein, putative
ingenoplastis_000014100.1 Peroxisomal biogenesis factor 11 (PEX11), putative
ingenoplastis_000014300.1 cyclin dependent kinase-binding protein, putative
ingenoplastis_000014400.1 hypothetical protein
ingenoplastis_000014500.1 hypothetical protein
ingenoplastis_000014600.1 hypothetical protein, conserved
ingenoplastis_000014700.1 hypothetical protein, conserved
ingenoplastis_000014900.1 hypothetical protein
ingenoplastis_000015000.1 hypothetical protein, conserved
ingenoplastis_000015100.1 Mitochondrial import receptor subunit ATOM69, putative
ingenoplastis_000015300.1 hypothetical protein, conserved
ingenoplastis_000015400.1 hypothetical protein, conserved
ingenoplastis_000015500.1 hypothetical protein, conserved
ingenoplastis_000015600.1 hypothetical protein, conserved
ingenoplastis_000015700.1 hypothetical protein, conserved
ingenoplastis_000015800.1 hypothetical protein, conserved
ingenoplastis_000015900.1 A/G-specific adenine glycosylase, putative
ingenoplastis_000016000.1 Rhodanese-like domain/Protein of unknown function (DUF2892), putative
ingenoplastis_000016100.1 Amastin surface glycoprotein, putative
ingenoplastis_000016500.1 Telomere recombination/Putative GTP-binding controlling metal-binding, putative
ingenoplastis_000016600.1 DNA-directed RNA polymerase-like protein
ingenoplastis_000016700.1 DPCD protein family, putative
ingenoplastis_000016800.1 NADH dehydrogenase subunit NB6M, putative
ingenoplastis_000016900.1 hypothetical protein, conserved
ingenoplastis_000017000.1 hypothetical protein, conserved
ingenoplastis_000017200.1 hypothetical protein, conserved
ingenoplastis_000017300.1 ribose 5-phosphate isomerase, putative
ingenoplastis_000017400.1 ribose 5-phosphate isomerase, putative
ingenoplastis_000017500.1 Elongation factor Tu GTP binding domain containing protein, putative
ingenoplastis_000017600.1 hypothetical protein
ingenoplastis_000017700.1 divalent cation transporter, putative
ingenoplastis_000017800.1 ZIP Zinc transporter, putative
ingenoplastis_000017900.1 hypothetical protein
ingenoplastis_000018000.1 hypothetical protein
ingenoplastis_000018100.1 hypothetical protein, conserved
ingenoplastis_000018200.1 hypothetical protein, conserved
ingenoplastis_000018300.1 Endonuclease/Exonuclease/phosphatase family, putative
ingenoplastis_000018400.1 Endonuclease/Exonuclease/phosphatase family, putative
ingenoplastis_000018500.1 hypothetical protein, conserved
ingenoplastis_000018600.1 Endonuclease/Exonuclease/phosphatase family, putative
ingenoplastis_000018700.1 hypothetical protein, conserved
ingenoplastis_000018800.1 hypothetical protein, conserved
ingenoplastis_000018900.1 Endonuclease/Exonuclease/phosphatase family, putative
ingenoplastis_000019000.1 Endonuclease/Exonuclease/phosphatase family, putative
ingenoplastis_000019100.1 Endonuclease/Exonuclease/phosphatase family, putative
ingenoplastis_000019200.1 Endonuclease/Exonuclease/phosphatase family, putative
ingenoplastis_000019300.1 Endonuclease/Exonuclease/phosphatase family, putative
ingenoplastis_000019400.1 Endonuclease/Exonuclease/phosphatase family, putative
ingenoplastis_000019500.1 hypothetical protein, conserved
ingenoplastis_000019600.1 hypothetical protein, conserved
ingenoplastis_000019700.1 hypothetical protein, conserved
ingenoplastis_000019800.1 Endonuclease/Exonuclease/phosphatase family, putative
ingenoplastis_000019900.1 hypothetical protein, conserved
ingenoplastis_000020000.1 hypothetical protein, conserved
ingenoplastis_000020100.1 Endonuclease/Exonuclease/phosphatase family, putative
ingenoplastis_000020200.1 Endonuclease/Exonuclease/phosphatase family, putative
ingenoplastis_000020300.1 hypothetical protein, conserved
ingenoplastis_000020400.1 Endonuclease/Exonuclease/phosphatase family, putative
ingenoplastis_000020500.1 hypothetical protein, conserved
ingenoplastis_000020600.1 hypothetical protein, conserved
ingenoplastis_000020700.1 hypothetical protein, conserved
ingenoplastis_000020800.1 hypothetical protein
ingenoplastis_000020900.1 Fungal tRNA ligase phosphodiesterase domain containing protein, putative
ingenoplastis_000021000.1 hypothetical protein
ingenoplastis_000021100.1 Endonuclease/Exonuclease/phosphatase family, putative
ingenoplastis_000021200.1 Endonuclease/Exonuclease/phosphatase family, putative
ingenoplastis_000021300.1 hypothetical protein, conserved
ingenoplastis_000021400.1 hypothetical protein, conserved
ingenoplastis_000021500.1 Endonuclease/Exonuclease/phosphatase family, putative
ingenoplastis_000021600.1 hypothetical protein, conserved
ingenoplastis_000021700.1 hypothetical protein, conserved
ingenoplastis_000021800.1 Endonuclease/Exonuclease/phosphatase family, putative
ingenoplastis_000021900.1 Endonuclease/Exonuclease/phosphatase family, putative
ingenoplastis_000022000.1 hypothetical protein, conserved
ingenoplastis_000022100.1 Endonuclease/Exonuclease/phosphatase family, putative
ingenoplastis_000022200.1 hypothetical protein, conserved
ingenoplastis_000022300.1 hypothetical protein, conserved
ingenoplastis_000022400.1 hypothetical protein, conserved
ingenoplastis_000022500.1 hypothetical protein, conserved
ingenoplastis_000022600.1 Endonuclease/Exonuclease/phosphatase family, putative
ingenoplastis_000022700.1 Endonuclease/Exonuclease/phosphatase family, putative
ingenoplastis_000022800.1 hypothetical protein, conserved
ingenoplastis_000022900.1 Maltose acetyltransferase/Hexapeptide repeat of succinyl-transferase/Bacterial transferase hexapeptide (six repeats), putative
ingenoplastis_000023000.1 poly(A) export protein, putative
ingenoplastis_000023200.1 hypothetical protein, conserved
ingenoplastis_000023300.1 hypothetical protein, conserved
ingenoplastis_000023400.1 Reverse transcriptase (RNA-dependent DNA polymerase), putative
ingenoplastis_000023500.1 hypothetical protein, conserved
ingenoplastis_000023600.1 Reverse transcriptase (RNA-dependent DNA polymerase), putative
ingenoplastis_000023700.1 hypothetical protein, conserved
ingenoplastis_000023800.1 hypothetical protein, conserved
ingenoplastis_000023900.1 Reverse transcriptase (RNA-dependent DNA polymerase), putative
ingenoplastis_000024400.1 hypothetical protein, conserved
ingenoplastis_000024500.1 Pumilio-family RNA binding repeat, putative
ingenoplastis_000024800.1 GDP-mannose pyrophosphorylase
ingenoplastis_000024900.1 hypothetical protein
ingenoplastis_000025000.1 hypothetical protein, conserved
ingenoplastis_000025100.1 agmatinase-like protein
ingenoplastis_000025500.1 hypothetical protein, conserved
ingenoplastis_000025600.1 Reverse transcriptase (RNA-dependent DNA polymerase), putative
ingenoplastis_000025700.1 MORN repeat, putative
ingenoplastis_000025800.1 similarity to endo-1-like protein
ingenoplastis_000025900.1 similarity to endo-1-like protein
ingenoplastis_000026000.1 similarity to endo-1-like protein
ingenoplastis_000026100.1 NADH-ubiquinone oxidoreductase, mitochondrial, putative
ingenoplastis_000026200.1 centrin, putative
ingenoplastis_000026300.1 Trypsin-like peptidase domain containing protein, putative
ingenoplastis_000026700.1 hypothetical protein, conserved
ingenoplastis_000026800.1 hypothetical protein, conserved
ingenoplastis_000026900.1 hypothetical protein
ingenoplastis_000027000.1 terbinafine resistance locus protein (yip1)
ingenoplastis_000027200.1 pteridine reductase 1
ingenoplastis_000027300.1 Zinc finger, C3HC4 type (RING finger) containing protein, putative
ingenoplastis_000027400.1 Checkpoint protein HUS1
ingenoplastis_000027500.1 hypothetical protein
ingenoplastis_000027700.1 hypothetical protein, conserved
ingenoplastis_000027800.1 Phage integrase family, putative
ingenoplastis_000027900.1 hypothetical protein, conserved
ingenoplastis_000028000.1 hypothetical protein, conserved
ingenoplastis_000028100.1 hypothetical protein, conserved
ingenoplastis_000028200.1 (H+)-ATPase G subunit, putative
ingenoplastis_000028300.1 hypothetical protein, conserved
ingenoplastis_000028400.1 hypothetical protein
ingenoplastis_000028500.1 hypothetical protein
ingenoplastis_000028600.1 Ribonuclease III domain containing protein, putative
ingenoplastis_000028700.1 ATP-binding cassette protein subfamily G, member 5
ingenoplastis_000028800.1 NADP-dependent alcohol dehydrogenase, putative
ingenoplastis_000028900.1 hypothetical protein, conserved
ingenoplastis_000029000.1 hypothetical protein, conserved
ingenoplastis_000029100.1 trypanothione synthetase, putative
ingenoplastis_000029200.1 zinc finger protein family member, putative
ingenoplastis_000029300.1 hypothetical protein, conserved
ingenoplastis_000029400.1 Domain of unknown function (DUF1935), putative
ingenoplastis_000029500.1 hypothetical protein
ingenoplastis_000029600.1 SNF1-related protein kinase regulatory subunit beta, putative
ingenoplastis_000029700.1 SET domain containing protein, putative
ingenoplastis_000029800.1 ribosomal RNA methyltransferase-like protein
ingenoplastis_000030000.1 hypothetical protein, conserved
ingenoplastis_000030100.1 5'-3' exoribonuclease C, putative
ingenoplastis_000030200.1 hypothetical protein
ingenoplastis_000030300.1 hypothetical protein, conserved
ingenoplastis_000030400.1 oxidoreductase-like protein
ingenoplastis_000030500.1 oxidoreductase-like protein
ingenoplastis_000030600.1 oxidoreductase-like protein
ingenoplastis_000030700.1 hypothetical protein, conserved
ingenoplastis_000030800.1 poly(A)-specific ribonuclease PARN, putative
ingenoplastis_000031600.1 Reverse transcriptase (RNA-dependent DNA polymerase), putative
ingenoplastis_000031700.1 hypothetical protein, conserved
ingenoplastis_000031800.1 hypothetical protein, conserved
ingenoplastis_000032000.1 hypothetical protein, conserved
ingenoplastis_000032200.1 hypothetical protein, conserved
ingenoplastis_000032300.1 hypothetical protein, conserved
ingenoplastis_000032400.1 hypothetical protein, conserved
ingenoplastis_000032500.1 hypothetical protein, conserved
ingenoplastis_000032600.1 hypothetical protein, conserved
ingenoplastis_000032700.1 hypothetical protein, conserved
ingenoplastis_000032800.1 hypothetical protein, conserved
ingenoplastis_000032900.1 hypothetical protein, conserved
ingenoplastis_000033000.1 hypothetical protein, conserved
ingenoplastis_000033100.1 hypothetical protein, conserved
ingenoplastis_000033200.1 hypothetical protein, conserved
ingenoplastis_000033300.1 hypothetical protein, conserved
ingenoplastis_000033400.1 hypothetical protein, conserved
ingenoplastis_000033500.1 hypothetical protein, conserved
ingenoplastis_000033600.1 hypothetical protein, conserved
ingenoplastis_000033700.1 hypothetical protein, conserved
ingenoplastis_000033800.1 hypothetical protein, conserved
ingenoplastis_000033900.1 hypothetical protein, conserved
ingenoplastis_000034400.1 hypothetical protein, conserved
ingenoplastis_000034500.1 hypothetical protein, conserved
ingenoplastis_000034600.1 hypothetical protein, conserved
ingenoplastis_000034700.1 hypothetical protein, conserved
ingenoplastis_000034800.1 hypothetical protein, conserved
ingenoplastis_000034900.1 hypothetical protein, conserved
ingenoplastis_000035000.1 C2 domain containing protein, putative
ingenoplastis_000035100.1 hypothetical protein, conserved
ingenoplastis_000035200.1 hypothetical protein, conserved
ingenoplastis_000035300.1 hypothetical protein, conserved
ingenoplastis_000035400.1 TatD related DNase, putative
ingenoplastis_000035500.1 hypothetical protein, conserved
ingenoplastis_000035600.1 Ubiquitin-like domain containing protein, putative
ingenoplastis_000035700.1 hypothetical protein
ingenoplastis_000035800.1 hypothetical protein, conserved
ingenoplastis_000035900.1 hypothetical protein, conserved
ingenoplastis_000036000.1 hypothetical protein, conserved
ingenoplastis_000036100.1 hypothetical protein, conserved
ingenoplastis_000036200.1 hypothetical protein, conserved
ingenoplastis_000036300.1 hypothetical protein, conserved
ingenoplastis_000036400.1 hypothetical protein, conserved
ingenoplastis_000036500.1 hypothetical protein, conserved
ingenoplastis_000036600.1 hypothetical protein, conserved
ingenoplastis_000036700.1 hypothetical protein
ingenoplastis_000036800.1 6-phosphofructo-2-kinase/fructose-2,6-biphosphatase, putative
ingenoplastis_000036900.1 hypothetical protein
ingenoplastis_000037100.1 hypothetical protein
ingenoplastis_000037200.1 hypothetical protein
ingenoplastis_000037300.1 CDP-alcohol phosphatidyltransferase, putative
ingenoplastis_000037400.1 hypothetical protein, conserved
ingenoplastis_000037500.1 hypothetical protein
ingenoplastis_000037600.1 hypothetical protein
ingenoplastis_000037700.1 hypothetical protein
ingenoplastis_000037800.1 hypothetical protein
ingenoplastis_000037900.1 hypothetical protein
ingenoplastis_000038000.1 hypothetical protein
ingenoplastis_000038100.1 hypothetical protein
ingenoplastis_000038200.1 hypothetical protein
ingenoplastis_000038300.1 Leucine Rich Repeat, putative
ingenoplastis_000038400.1 hypothetical protein
ingenoplastis_000038600.1 inorganic pyrophosphatase, putative
ingenoplastis_000038700.1 hypothetical protein, conserved
ingenoplastis_000039000.1 hypothetical protein, conserved
ingenoplastis_000039100.1 hypothetical protein, conserved
ingenoplastis_000039200.1 hypothetical protein, conserved
ingenoplastis_000039600.1 leucine-rich repeat protein, putative
ingenoplastis_000039800.1 chaperone protein DNAj, putative
ingenoplastis_000039900.1 protein phosphatase 2A catalytic subunit, putative
ingenoplastis_000040000.1 hypothetical protein, conserved
ingenoplastis_000040100.1 MIZ/SP-RING zinc finger containing protein, putative
ingenoplastis_000040200.1 ATP-binding cassette protein subfamily B, member 3, putative
ingenoplastis_000040300.1 hypothetical protein
ingenoplastis_000040400.1 hypothetical protein
ingenoplastis_000040500.1 Serine hydrolase (FSH1)/50S ribosome-binding GTPase/GTPase of unknown function C-terminal, putative
ingenoplastis_000040600.1 Flagellar Member 7
ingenoplastis_000040700.1 hypothetical protein, conserved
ingenoplastis_000040800.1 hypothetical protein, conserved
ingenoplastis_000040900.1 hypothetical protein
ingenoplastis_000041000.1 Leucine Rich repeat, putative
ingenoplastis_000041100.1 NADH dehydrogenase subunit NI8M, putative
ingenoplastis_000041200.1 mitochondrial RNA binding protein, putative
ingenoplastis_000041300.1 Golgi transport complex subunit 5, putative
ingenoplastis_000041400.1 hypothetical protein, conserved
ingenoplastis_000041500.1 ADP-ribosylation factor family/50S ribosome-binding GTPase/Miro-like protein/Ras family, putative
ingenoplastis_000041600.1 hypothetical protein
ingenoplastis_000041700.1 hypothetical protein
ingenoplastis_000041800.1 hypothetical protein
ingenoplastis_000041900.1 hypothetical protein
ingenoplastis_000042000.1 Guanine nucleotide exchange factor in Golgi transport N-terminal/Sec7 domain containing protein, putative
ingenoplastis_000042100.1 As/Sb Reductase
ingenoplastis_000042200.1 hypothetical protein, conserved
ingenoplastis_000042300.1 Sybindin-like family/Sedlin, N-terminal conserved region containing protein, putative
ingenoplastis_000042400.1 ribosomal protein L27, putative
ingenoplastis_000042600.1 ribosomal protein L27, putative
ingenoplastis_000042700.1 hypothetical protein, conserved
ingenoplastis_000042800.1 hypothetical protein, conserved
ingenoplastis_000043000.1 L-Lysine transport protein, putative
ingenoplastis_000043100.1 L-Lysine transport protein, putative
ingenoplastis_000043200.1 hypothetical protein
ingenoplastis_000043300.1 SpoU rRNA Methylase family, putative
ingenoplastis_000043400.1 superoxide dismutase, putative
ingenoplastis_000043500.1 Complex1_LYR-like, putative
ingenoplastis_000043600.1 hypothetical protein
ingenoplastis_000043700.1 hypothetical protein, conserved
ingenoplastis_000043900.1 adenosine monophosphate deaminase, putative
ingenoplastis_000044000.1 hypothetical protein
ingenoplastis_000044100.1 hypothetical protein
ingenoplastis_000044200.1 Cyclic nucleotide-binding domain containing protein, putative
ingenoplastis_000044400.1 hypothetical protein, conserved
ingenoplastis_000044500.1 hypothetical protein
ingenoplastis_000044600.1 Cid1 family poly A polymerase, putative
ingenoplastis_000044700.1 Cid1 family poly A polymerase, putative
ingenoplastis_000044800.1 mitochondrial RNA binding complex 1 subunit, putative
ingenoplastis_000044900.1 NOL1/NOP2/sun family, putative
ingenoplastis_000045000.1 hypothetical protein, conserved
ingenoplastis_000045100.1 hypothetical protein
ingenoplastis_000045200.1 Haloacid dehalogenase-like hydrolase, putative
ingenoplastis_000045300.1 hypothetical protein, conserved
ingenoplastis_000045400.1 aquaporin-like protein
ingenoplastis_000045600.1 hypothetical protein, conserved
ingenoplastis_000045700.1 hypothetical protein, conserved
ingenoplastis_000045800.1 hypothetical protein, conserved
ingenoplastis_000045900.1 C-14 sterol reductase, putative
ingenoplastis_000046000.1 hypothetical protein, conserved
ingenoplastis_000046100.1 hypothetical protein
ingenoplastis_000046200.1 sphingosine-1-phosphate phosphatase, putative
ingenoplastis_000046400.1 membrane associated protein-like protein
ingenoplastis_000046500.1 hypothetical protein
ingenoplastis_000046600.1 heat shock protein Hsp20, putative
ingenoplastis_000046700.1 methionyl-tRNA formyltransferase, putative
ingenoplastis_000046800.1 ATP-dependent RNA helicase, putative
ingenoplastis_000046900.1 hypothetical protein
ingenoplastis_000047000.1 expression-site associated gene (ESAG3), putative
ingenoplastis_000047100.1 Phage integrase family, putative
ingenoplastis_000047200.1 hypothetical protein, conserved
ingenoplastis_000047300.1 hypothetical protein, conserved
ingenoplastis_000047400.1 expression-site associated gene (ESAG3), putative
ingenoplastis_000047500.1 NADH-ubiquinone oxidoreductase complex I subunit, putative
ingenoplastis_000047700.1 hypothetical protein, conserved
ingenoplastis_000047800.1 SAC3/GANP/Nin1/mts3/eIF-3 p25 family/COP9 signalosome, subunit CSN8, putative
ingenoplastis_000047900.1 hypothetical protein, conserved
ingenoplastis_000048000.1 R-SNARE protein, putative
ingenoplastis_000048300.1 hypothetical protein, conserved
ingenoplastis_000048500.1 hypothetical protein, conserved
ingenoplastis_000048600.1 hypothetical protein, conserved
ingenoplastis_000048700.1 hypothetical protein, conserved
ingenoplastis_000048800.1 hypothetical protein, conserved
ingenoplastis_000048900.1 hypothetical protein, conserved
ingenoplastis_000049000.1 hypothetical protein, conserved
ingenoplastis_000049200.1 Reverse transcriptase (RNA-dependent DNA polymerase), putative
ingenoplastis_000049400.1 hypothetical protein, conserved
ingenoplastis_000049600.1 coatomer subunit zeta, putative
ingenoplastis_000049700.1 prohibitin, putative
ingenoplastis_000049800.1 hypothetical protein, conserved
ingenoplastis_000049900.1 hypothetical protein
ingenoplastis_000050000.1 histone deacetylase, putative
ingenoplastis_000050100.1 hypothetical protein, conserved
ingenoplastis_000050200.1 Emopamil binding protein, putative
ingenoplastis_000050300.1 60S ribosomal protein L44, putative
ingenoplastis_000050400.1 chaperonin TCP20, putative
ingenoplastis_000050500.1 dynein heavy chain, putative
ingenoplastis_000050600.1 mitochondrial DNA polymerase I protein D, putative
ingenoplastis_000050700.1 squalene monooxygenase-like protein
ingenoplastis_000050800.1 Kinesin-13 5, putative
ingenoplastis_000050900.1 hypothetical protein, conserved
ingenoplastis_000051000.1 hypothetical protein
ingenoplastis_000051100.1 T-complex protein 10 C-terminus, putative
ingenoplastis_000051200.1 ubiquitin-conjugating enzyme, putative
ingenoplastis_000051300.1 ras-like small GTPases, putative
ingenoplastis_000051400.1 hypothetical protein, conserved
ingenoplastis_000051600.1 DNA repair metallo-beta-lactamase, putative
ingenoplastis_000051700.1 Ran-binding protein 1, putative
ingenoplastis_000051900.1 hypothetical protein, conserved
ingenoplastis_000052000.1 hypothetical protein, conserved
ingenoplastis_000052100.1 SPRY domain/HECT-domain (ubiquitin-transferase), putative
ingenoplastis_000052300.1 hypothetical protein, conserved
ingenoplastis_000052900.1 hypothetical protein, conserved
ingenoplastis_000053600.1 TPR-repeat protein, putative
ingenoplastis_000053700.1 heat shock protein DNAJ, putative
ingenoplastis_000053800.1 aldo-keto reductase-like protein
ingenoplastis_000053900.1 3-oxoacyl-ACP reductase, putative
ingenoplastis_000054000.1 hypothetical protein, conserved
ingenoplastis_000054100.1 protein kinase, putative
ingenoplastis_000054200.1 protein kinase, putative
ingenoplastis_000054300.1 protein kinase, putative
ingenoplastis_000054400.1 WD-repeat protein
ingenoplastis_000054500.1 tubulin-tyrosine ligase-like protein
ingenoplastis_000054600.1 hypothetical protein, conserved
ingenoplastis_000054700.1 dynein heavy chain, putative
ingenoplastis_000054800.1 delta-12 fatty acid desaturase
ingenoplastis_000054900.1 GIPL galf transferase, putative
ingenoplastis_000055000.1 Chlamydia CHLPS protein (DUF818)/Alpha/beta hydrolase family/alpha/beta hydrolase fold, putative
ingenoplastis_000055100.1 ribonucleoside-diphosphate reductase small chain, putative
ingenoplastis_000055200.1 ribonucleoside-diphosphate reductase small chain, putative
ingenoplastis_000055300.1 hypothetical protein
ingenoplastis_000055400.1 Mitochondrial carrier protein, putative
ingenoplastis_000055500.1 hypothetical protein
ingenoplastis_000055600.1 GMP-PDE, delta subunit, putative
ingenoplastis_000055700.1 Rab-GTPase-TBC domain containing protein, putative
ingenoplastis_000055800.1 FtsJ cell division protein, putative
ingenoplastis_000055900.1 Eukaryotic protein of unknown function (DUF846), putative
ingenoplastis_000056000.1 hypothetical protein, conserved
ingenoplastis_000056100.1 protein kinase-like protein
ingenoplastis_000056200.1 hypothetical protein, conserved
ingenoplastis_000056300.1 endo/exonuclease Mre11, putative
ingenoplastis_000056400.1 hypothetical protein, conserved
ingenoplastis_000056500.1 trypanothione synthetase, putative
ingenoplastis_000056600.1 trypanothione synthetase, putative
ingenoplastis_000056700.1 hypothetical protein
ingenoplastis_000056800.1 paraflagellar rod protein 5, putative
ingenoplastis_000056900.1 Dual specificity phosphatase, catalytic domain containing protein, putative
ingenoplastis_000057000.1 GTP binding protein, putative
ingenoplastis_000057100.1 hypothetical protein, conserved
ingenoplastis_000057300.1 Phosphoenolpyruvate carboxykinase, putative
ingenoplastis_000057500.1 Phosphoenolpyruvate carboxykinase, putative
ingenoplastis_000057600.1 Phosphoenolpyruvate carboxykinase, putative
ingenoplastis_000057700.1 Phosphoenolpyruvate carboxykinase, putative
ingenoplastis_000057800.1 Phosphoenolpyruvate carboxykinase, putative
ingenoplastis_000057900.1 glycosomal phosphoenolpyruvate carboxykinase, putative
ingenoplastis_000058400.1 Predicted AAA-ATPase, putative
ingenoplastis_000058500.1 Protein of unknown function (DUF1703), putative
ingenoplastis_000058600.1 hypothetical protein, conserved
ingenoplastis_000058700.1 Protein of unknown function (DUF1703), putative
ingenoplastis_000058800.1 hypothetical protein
ingenoplastis_000058900.1 hypothetical protein, conserved
ingenoplastis_000059000.1 hypothetical protein
ingenoplastis_000059100.1 hypothetical protein, conserved
ingenoplastis_000059200.1 expression-site associated gene (ESAG3), putative
ingenoplastis_000059300.1 cell cycle associated protein MOB1, putative
ingenoplastis_000059600.1 proteasome beta-1 subunit, putative
ingenoplastis_000059900.1 ribonuclease mar1
ingenoplastis_000060000.1 hypothetical protein, conserved
ingenoplastis_000060200.1 thiol-dependent reductase 1
ingenoplastis_000060300.1 hypothetical protein, conserved
ingenoplastis_000060400.1 Plus-3 domain/Zinc finger, C3HC4 type (RING finger) containing protein, putative
ingenoplastis_000060500.1 hypothetical protein
ingenoplastis_000060600.1 hypothetical protein, conserved
ingenoplastis_000060700.1 hypothetical protein, conserved
ingenoplastis_000060800.1 hypothetical protein
ingenoplastis_000060900.1 hypothetical protein
ingenoplastis_000061000.1 ERAD-associated E3 ubiquitin-protein ligase HRD1, putative
ingenoplastis_000061100.1 dolichyl-P-Man:GDP-Man5GlcNAc2-PP-dolichyl alpha-1,2-mannosyltransferase, putative
ingenoplastis_000061200.1 hypothetical protein
ingenoplastis_000061300.1 hypothetical protein, conserved
ingenoplastis_000061400.1 Ubiquitin carboxyl-terminal hydrolase, putative
ingenoplastis_000061500.1 ubiquitin hydrolase, putative
ingenoplastis_000061600.1 proteasome regulatory ATPase subunittcc1l8.3, putative
ingenoplastis_000061800.1 hypothetical protein, conserved
ingenoplastis_000061900.1 Importin 1
ingenoplastis_000062000.1 cysteinyl-tRNA synthetase, putative
ingenoplastis_000062100.1 Leucine Rich Repeat, putative
ingenoplastis_000062200.1 Hsp70 protein, putative
ingenoplastis_000062400.1 SET domain containing protein, putative
ingenoplastis_000062500.1 ornithine decarboxylase, putative
ingenoplastis_000062600.1 hypothetical protein, conserved
ingenoplastis_000062700.1 hypothetical protein, conserved
ingenoplastis_000062800.1 MORN repeat, putative
ingenoplastis_000062900.1 hypothetical protein, conserved
ingenoplastis_000063000.1 hypothetical protein, conserved
ingenoplastis_000063100.1 hypothetical protein, conserved
ingenoplastis_000063200.1 hypothetical protein
ingenoplastis_000063300.1 hypothetical protein
ingenoplastis_000063400.1 CCR4-NOT transcription complex subunit 2, putative
ingenoplastis_000063500.1 hypothetical protein
ingenoplastis_000063600.1 hypothetical protein, conserved
ingenoplastis_000063700.1 hypothetical protein, conserved
ingenoplastis_000063800.1 hypothetical protein, conserved
ingenoplastis_000063900.1 hypothetical protein, conserved
ingenoplastis_000064000.1 hypothetical protein, conserved
ingenoplastis_000064100.1 hypothetical protein, conserved
ingenoplastis_000064200.1 hypothetical protein, conserved
ingenoplastis_000064300.1 hypothetical protein, conserved
ingenoplastis_000064400.1 hypothetical protein, conserved
ingenoplastis_000064500.1 hypothetical protein, conserved
ingenoplastis_000064600.1 hypothetical protein, conserved
ingenoplastis_000065200.1 Eukaryotic protein of unknown function (DUF866), putative
ingenoplastis_000065300.1 Iron-containing alcohol dehydrogenase, putative
ingenoplastis_000065400.1 Iron-containing alcohol dehydrogenase, putative
ingenoplastis_000065500.1 Iron-containing alcohol dehydrogenase, putative
ingenoplastis_000065600.1 Iron-containing alcohol dehydrogenase, putative
ingenoplastis_000065700.1 Iron-containing alcohol dehydrogenase, putative
ingenoplastis_000066300.1 Iron-containing alcohol dehydrogenase, putative
ingenoplastis_000066600.1 programmed cell death 6 protein-like protein
ingenoplastis_000066700.1 hypothetical protein, conserved
ingenoplastis_000066800.1 hypothetical protein
ingenoplastis_000066900.1 hypothetical protein, conserved
ingenoplastis_000067000.1 hypothetical protein
ingenoplastis_000067100.1 hypothetical protein
ingenoplastis_000067200.1 hypothetical protein
ingenoplastis_000067300.1 hypothetical protein
ingenoplastis_000067400.1 hypothetical protein
ingenoplastis_000067500.1 WW domain containing protein, putative
ingenoplastis_000067600.1 mitochondrial DNA topoisomerase II
ingenoplastis_000067900.1 glucose-6-phosphate isomerase
ingenoplastis_000068000.1 hypothetical protein
ingenoplastis_000068100.1 Phosphoglucose isomerase, putative
ingenoplastis_000068200.1 Phosphoglucose isomerase, putative
ingenoplastis_000068400.1 transporter, putative
ingenoplastis_000068600.1 transporter, putative
ingenoplastis_000068900.1 transporter, putative
ingenoplastis_000069200.1 transporter, putative
ingenoplastis_000069400.1 transporter, putative
ingenoplastis_000069500.1 hypothetical protein, conserved
ingenoplastis_000069600.1 hypothetical protein
ingenoplastis_000069700.1 hypothetical protein
ingenoplastis_000069800.1 hypothetical protein, conserved
ingenoplastis_000069900.1 hypothetical protein
ingenoplastis_000070000.1 Fusaric acid resistance protein-like, putative
ingenoplastis_000070100.1 Rhodanese-like domain containing protein, putative
ingenoplastis_000070200.1 Sulfatase, putative
ingenoplastis_000070300.1 Tetratricopeptide repeat/TPR repeat, putative
ingenoplastis_000070400.1 alanine aminotransferase
ingenoplastis_000070500.1 alanine aminotransferase
ingenoplastis_000070600.1 primase 2, putative
ingenoplastis_000070700.1 hypothetical protein, conserved
ingenoplastis_000070900.1 Protein of unknown function (DUF1448), putative
ingenoplastis_000071100.1 Leucine Rich repeat, putative
ingenoplastis_000071200.1 Protein of unknown function (DUF962), putative
ingenoplastis_000071300.1 hypothetical protein
ingenoplastis_000071400.1 hypothetical protein
ingenoplastis_000071500.1 hypothetical protein, conserved
ingenoplastis_000071600.1 hypothetical protein
ingenoplastis_000071700.1 DnaJ domain containing protein, putative
ingenoplastis_000071800.1 DnaJ domain containing protein, putative
ingenoplastis_000071900.1 hypothetical protein, conserved
ingenoplastis_000072000.1 Peptidase family M20/M25/M40/Peptidase dimerisation domain containing protein, putative
ingenoplastis_000072300.1 NADH:flavin oxidoreductase/NADH oxidase, putative
ingenoplastis_000072400.1 NADH:flavin oxidoreductase/NADH oxidase, putative
ingenoplastis_000072500.1 NADH:flavin oxidoreductase / NADH oxidase family, putative
ingenoplastis_000072600.1 NADH:flavin oxidoreductase / NADH oxidase family, putative
ingenoplastis_000072700.1 expression-site associated gene (ESAG3), putative
ingenoplastis_000072800.1 hypothetical protein, conserved
ingenoplastis_000072900.1 hypothetical protein, conserved
ingenoplastis_000073000.1 XRN 5'-3' exonuclease N-terminus, putative
ingenoplastis_000073100.1 tubulin tyrosine ligase, putative
ingenoplastis_000073200.1 3-Beta-hydroxysteroid-delta(8), delta(7)-isomerase, putative
ingenoplastis_000073400.1 hypothetical protein, conserved
ingenoplastis_000073500.1 2OG-Fe(II) oxygenase superfamily, putative
ingenoplastis_000073700.1 hypothetical protein, conserved
ingenoplastis_000074000.1 hypothetical protein, conserved
ingenoplastis_000074100.1 hypothetical protein, conserved
ingenoplastis_000074200.1 hypothetical protein, conserved
ingenoplastis_000074300.1 hypothetical protein
ingenoplastis_000074400.1 Met-10+ like-protein, putative
ingenoplastis_000074500.1 Met-10+ like-protein, putative
ingenoplastis_000074600.1 protein kinase, putative
ingenoplastis_000074800.1 serine peptidase clan SC, family S9A, putative
ingenoplastis_000074900.1 hypothetical protein, conserved
ingenoplastis_000075100.1 proteasome 26S non-ATPase subunit 9, putative
ingenoplastis_000075200.1 hypothetical protein
ingenoplastis_000075300.1 hypothetical protein
ingenoplastis_000075400.1 hypothetical protein, conserved
ingenoplastis_000075600.1 protein tyrosine phosphatase-likie protein
ingenoplastis_000075800.1 Homocysteine S-methyltransferase, putative
ingenoplastis_000075900.1 protein tyrosine phosphatase-like protein
ingenoplastis_000076000.1 hypothetical protein
ingenoplastis_000076100.1 mitochondrial ornithine transporter 1-like protein
ingenoplastis_000076200.1 mitochondrial ornithine carrier protein-like protein
ingenoplastis_000076300.1 Las1-like, putative
ingenoplastis_000076400.1 SMP-30/Gluconolaconase/LRE-like region containing protein, putative
ingenoplastis_000076500.1 hypothetical protein, conserved
ingenoplastis_000076600.1 hypothetical protein, conserved
ingenoplastis_000076700.1 hypothetical protein, conserved
ingenoplastis_000076800.1 50S ribosomal protein L17, putative
ingenoplastis_000076900.1 eukaryotic translation initiation factor 1A, putative
ingenoplastis_000077000.1 Galactose oxidase, central domain/Domain of unknown function (DUF4110), putative
ingenoplastis_000077400.1 hypothetical protein, conserved
ingenoplastis_000078200.1 hypothetical protein, conserved
ingenoplastis_000078300.1 heat shock protein 83-17
ingenoplastis_000078400.1 heat shock protein 83-17
ingenoplastis_000078500.1 heat shock protein 83-17
ingenoplastis_000078600.1 heat shock protein 83-17
ingenoplastis_000078700.1 heat shock protein 83-17
ingenoplastis_000078800.1 heat shock protein 83-17
ingenoplastis_000078900.1 heat shock protein 83-17
ingenoplastis_000079000.1 heat shock protein 83-17
ingenoplastis_000079100.1 heat shock protein 83-17
ingenoplastis_000079200.1 heat shock protein 83-17
ingenoplastis_000079300.1 heat shock protein 83-17
ingenoplastis_000079400.1 heat shock protein 83-17
ingenoplastis_000079500.1 heat shock protein 83-17
ingenoplastis_000079600.1 heat shock protein 83-17
ingenoplastis_000079700.1 Mannitol dehydrogenase Rossmann domain/Mannitol dehydrogenase C-terminal domain containing protein, putative
ingenoplastis_000079900.1 ATP-binding cassette subfamily A, member 1, putative
ingenoplastis_000080100.1 AAA domain containing protein, putative
ingenoplastis_000080200.1 ATP-binding cassette subfamily A, member 1, putative
ingenoplastis_000080300.1 SKP1-like protein
ingenoplastis_000080500.1 eukaryotic release factor 3, putative
ingenoplastis_000080700.1 60S ribosomal protein L28, putative
ingenoplastis_000080800.1 hypothetical protein
ingenoplastis_000080900.1 60S ribosomal protein L28, putative
ingenoplastis_000081000.1 sterol 14-alpha-demethylase, putative
ingenoplastis_000081100.1 palmitoyl acyltransferase 7, putative
ingenoplastis_000081200.1 palmitoyl acyltransferase 7, putative
ingenoplastis_000081300.1 palmitoyl acyltransferase 7, putative
ingenoplastis_000081400.1 pretranslocation protein, alpha subunit, putative
ingenoplastis_000081500.1 hypothetical protein, conserved
ingenoplastis_000081600.1 hypothetical protein, conserved
ingenoplastis_000081700.1 inositol-1,4,5-trisphosphate (IP3) 5-phosphatase, putative
ingenoplastis_000081900.1 PEP-utilising enzyme, TIM barrel domain containing protein, putative
ingenoplastis_000082000.1 adaptin-related protein-like protein
ingenoplastis_000082100.1 40S ribosomal protein S5
ingenoplastis_000082200.1 hypothetical protein
ingenoplastis_000082300.1 hypothetical protein
ingenoplastis_000082400.1 hypothetical protein
ingenoplastis_000082500.1 hypothetical protein, conserved
ingenoplastis_000082600.1 hypothetical protein, conserved
ingenoplastis_000082700.1 hypothetical protein, conserved
ingenoplastis_000082800.1 hypothetical protein, conserved
ingenoplastis_000082900.1 hypothetical protein, conserved
ingenoplastis_000083000.1 hypothetical protein, conserved
ingenoplastis_000083100.1 hypothetical protein, conserved
ingenoplastis_000083200.1 hypothetical protein, conserved
ingenoplastis_000083300.1 hypothetical protein, conserved
ingenoplastis_000083400.1 hypothetical protein, conserved
ingenoplastis_000083500.1 hypothetical protein
ingenoplastis_000083700.1 hypothetical protein, conserved
ingenoplastis_000083800.1 hypothetical protein, conserved
ingenoplastis_000083900.1 hypothetical protein, conserved
ingenoplastis_000084000.1 hypothetical protein, conserved
ingenoplastis_000084100.1 hypothetical protein, conserved
ingenoplastis_000084200.1 hypothetical protein, conserved
ingenoplastis_000084300.1 hypothetical protein, conserved
ingenoplastis_000084400.1 hypothetical protein, conserved
ingenoplastis_000084500.1 Helicase conserved C-terminal domain containing protein, putative
ingenoplastis_000084600.1 hypothetical protein, conserved
ingenoplastis_000084700.1 hypothetical protein, conserved
ingenoplastis_000084800.1 hypothetical protein, conserved
ingenoplastis_000084900.1 Poly(ADP-ribose) polymerase catalytic domain containing protein, putative
ingenoplastis_000085000.1 hypothetical protein, conserved
ingenoplastis_000085100.1 hypothetical protein, conserved
ingenoplastis_000085200.1 Poly(ADP-ribose) polymerase catalytic domain containing protein, putative
ingenoplastis_000085300.1 hypothetical protein, conserved
ingenoplastis_000085400.1 hypothetical protein, conserved
ingenoplastis_000085500.1 hypothetical protein, conserved
ingenoplastis_000085600.1 hypothetical protein, conserved
ingenoplastis_000085700.1 hypothetical protein, conserved
ingenoplastis_000085800.1 hypothetical protein, conserved
ingenoplastis_000085900.1 hypothetical protein, conserved
ingenoplastis_000086000.1 hypothetical protein, conserved
ingenoplastis_000086100.1 hypothetical protein, conserved
ingenoplastis_000086200.1 hypothetical protein, conserved
ingenoplastis_000086400.1 hypothetical protein, conserved
ingenoplastis_000086500.1 hypothetical protein
ingenoplastis_000086600.1 cytidine triphosphate synthase, putative
ingenoplastis_000086800.1 hypothetical protein
ingenoplastis_000086900.1 MORN repeat, putative
ingenoplastis_000087000.1 hypothetical protein, conserved
ingenoplastis_000087100.1 hypothetical protein, conserved
ingenoplastis_000087200.1 hypothetical protein, conserved
ingenoplastis_000087300.1 Quinonprotein alcohol dehydrogenase-like protein, putative
ingenoplastis_000087400.1 Kinesin motor domain containing protein, putative
ingenoplastis_000087500.1 hypothetical protein
ingenoplastis_000087600.1 hypothetical protein
ingenoplastis_000087700.1 hypothetical protein, conserved
ingenoplastis_000087800.1 kinesin heavy chain, putative
ingenoplastis_000088000.1 serine/threonine protein phosphatase 2A regulatory subunit, putative
ingenoplastis_000088100.1 hypothetical protein, conserved
ingenoplastis_000088200.1 Protein of unknown function (DUF775), putative
ingenoplastis_000088300.1 hypothetical protein, conserved
ingenoplastis_000088400.1 conserved protein, unknown function
ingenoplastis_000088500.1 hypothetical protein
ingenoplastis_000088600.1 conserved protein, unknown function
ingenoplastis_000088700.1 protein kinase, putative
ingenoplastis_000088800.1 Tubulin/FtsZ family, putative
ingenoplastis_000088900.1 tubulin-tyrosine ligase, putative
ingenoplastis_000089000.1 vesicular-fusion protein nsf, putative
ingenoplastis_000089100.1 4'-phosphopantetheinyl transferase superfamily, putative
ingenoplastis_000089300.1 hypothetical protein, conserved
ingenoplastis_000089500.1 Transcription elongation factor 1 domain-containing protein
ingenoplastis_000089600.1 RNA editing endoribonuclease
ingenoplastis_000089700.1 AATF protein, putative
ingenoplastis_000090000.1 conserved protein, unknown function
ingenoplastis_000090100.1 Protein kinase domain/Protein tyrosine kinase, putative
ingenoplastis_000090200.1 protein kinase, putative
ingenoplastis_000090300.1 protein kinase, putative
ingenoplastis_000090400.1 hypothetical protein, conserved
ingenoplastis_000090500.1 protein kinase, putative
ingenoplastis_000090600.1 hypothetical protein, conserved
ingenoplastis_000090700.1 protein kinase, putative
ingenoplastis_000090800.1 hypothetical protein, conserved
ingenoplastis_000090900.1 hypothetical protein, conserved
ingenoplastis_000091000.1 protein kinase, putative
ingenoplastis_000091100.1 hypothetical protein, conserved
ingenoplastis_000091200.1 protein kinase, putative
ingenoplastis_000091300.1 hypothetical protein, conserved
ingenoplastis_000091400.1 protein kinase, putative
ingenoplastis_000091500.1 Protein kinase domain containing protein, putative
ingenoplastis_000091600.1 hypothetical protein
ingenoplastis_000091700.1 hypothetical protein, conserved
ingenoplastis_000091800.1 hypothetical protein
ingenoplastis_000091900.1 glutaredoxin, putative
ingenoplastis_000092000.1 hypothetical protein
ingenoplastis_000092100.1 hypothetical protein
ingenoplastis_000092200.1 WD40 repeat-containing protein
ingenoplastis_000092300.1 hypothetical protein, conserved
ingenoplastis_000092400.1 hypothetical protein, conserved
ingenoplastis_000092500.1 hypothetical protein, conserved
ingenoplastis_000092600.1 hypothetical protein, conserved
ingenoplastis_000092700.1 hypothetical protein, conserved
ingenoplastis_000092800.1 hypothetical protein, conserved
ingenoplastis_000092900.1 AAA domain/Part of AAA domain/Helicase, putative
ingenoplastis_000093100.1 hypothetical protein, conserved
ingenoplastis_000093200.1 hypothetical protein, conserved
ingenoplastis_000093300.1 AAA domain/Part of AAA domain/Helicase, putative
ingenoplastis_000093400.1 hypothetical protein, conserved
ingenoplastis_000093500.1 hypothetical protein, conserved
ingenoplastis_000093600.1 hypothetical protein, conserved
ingenoplastis_000093700.1 hypothetical protein, conserved
ingenoplastis_000093800.1 hypothetical protein, conserved
ingenoplastis_000093900.1 hypothetical protein, conserved
ingenoplastis_000094000.1 hypothetical protein, conserved
ingenoplastis_000094100.1 hypothetical protein, conserved
ingenoplastis_000094200.1 hypothetical protein, conserved
ingenoplastis_000094300.1 hypothetical protein, conserved
ingenoplastis_000094400.1 Poly(ADP-ribose) polymerase and DNA-Ligase Zn-finger region/Zinc-finger (CX5CX6HX5H) motif containing protein, putative
ingenoplastis_000094500.1 hypothetical protein, conserved
ingenoplastis_000094600.1 hypothetical protein, conserved
ingenoplastis_000094700.1 hypothetical protein, conserved
ingenoplastis_000094800.1 hypothetical protein, conserved
ingenoplastis_000094900.1 hypothetical protein, conserved
ingenoplastis_000095000.1 hypothetical protein, conserved
ingenoplastis_000095100.1 hypothetical protein
ingenoplastis_000095200.1 hypothetical protein
ingenoplastis_000095300.1 phosphatidylinositol 3-kinase, putative
ingenoplastis_000095400.1 DNAj-like protein
ingenoplastis_000095500.1 Protein transport protein yif1, putative
ingenoplastis_000095600.1 hypothetical protein, conserved
ingenoplastis_000096100.1 hypothetical protein, conserved
ingenoplastis_000096200.1 hypothetical protein, conserved
ingenoplastis_000096300.1 Reverse transcriptase (RNA-dependent DNA polymerase), putative
ingenoplastis_000096400.1 hypothetical protein, conserved
ingenoplastis_000096800.1 4-methyl-5(beta-hydroxyethyl)-thiazole monophosphate synthesis protein, putative
ingenoplastis_000096900.1 hypothetical protein
ingenoplastis_000097000.1 hypothetical protein, conserved
ingenoplastis_000097100.1 GrpE, putative
ingenoplastis_000097200.1 mitochondrial oligo_U binding protein TBRGG1, putative
ingenoplastis_000097300.1 hypothetical protein
ingenoplastis_000097400.1 rac serine-threonine kinase, putative
ingenoplastis_000097500.1 rac serine-threonine kinase, putative
ingenoplastis_000097600.1 hypothetical protein
ingenoplastis_000097700.1 AdoMet dependent proline di-methyltransferase/Methyltransferase domain/O-methyltransferase, putative
ingenoplastis_000097800.1 Prefoldin subunit, putative
ingenoplastis_000098000.1 GDP-mannose 4,6 dehydratase, putative
ingenoplastis_000098100.1 amastin-like surface protein-like protein
ingenoplastis_000098200.1 amastin-like surface protein-like protein
ingenoplastis_000098300.1 adenosine kinase, putative
ingenoplastis_000098400.1 ubiquitin-protein ligase, putative
ingenoplastis_000098600.1 hypothetical protein, conserved
ingenoplastis_000098700.1 p22 protein precursor, putative
ingenoplastis_000098800.1 hypothetical protein
ingenoplastis_000098900.1 protein kinase, putative
ingenoplastis_000099000.1 ubiquitin conjugation factor E4 B, putative
ingenoplastis_000099100.1 hypothetical protein, conserved
ingenoplastis_000099200.1 DNAj-like protein
ingenoplastis_000099300.1 hypothetical protein
ingenoplastis_000099400.1 hypothetical protein, conserved
ingenoplastis_000099500.1 mitochondrial carrier protein-like protein
ingenoplastis_000099600.1 hypothetical protein
ingenoplastis_000099700.1 malonyl-coa decarboxylase-like protein
ingenoplastis_000099800.1 hypothetical protein
ingenoplastis_000099900.1 hypothetical protein, conserved
ingenoplastis_000100000.1 DREV methyltransferase, putative
ingenoplastis_000100100.1 RNA-binding protein, putative
ingenoplastis_000100400.1 hypothetical protein
ingenoplastis_000100500.1 Transmembrane protein, putative
ingenoplastis_000100600.1 ubiquitin hydrolase, putative
ingenoplastis_000100700.1 Zinc finger, C3HC4 type (RING finger) containing protein, putative
ingenoplastis_000100900.1 pyridoxal kinase, putative
ingenoplastis_000101000.1 hypothetical protein
ingenoplastis_000101100.1 hypothetical protein
ingenoplastis_000101200.1 hypothetical protein, conserved
ingenoplastis_000101300.1 hypothetical protein, conserved
ingenoplastis_000101400.1 vacuolar assembly protein vps41, putative
ingenoplastis_000101500.1 U3 small nuclear ribonucleoprotein (snRNP), putative
ingenoplastis_000101600.1 hypothetical protein, conserved
ingenoplastis_000101700.1 hypothetical protein
ingenoplastis_000101800.1 ATP-binding cassette protein subfamily H, member 3, putative
ingenoplastis_000101900.1 GTPase activating protein, putative
ingenoplastis_000102000.1 hypothetical protein, conserved
ingenoplastis_000102100.1 Rio2, N-terminal/RIO1 family/Phosphotransferase enzyme family, putative
ingenoplastis_000102200.1 hypothetical protein, conserved
ingenoplastis_000102300.1 WD domain, G-beta repeat, putative
ingenoplastis_000102400.1 PLAC8 family, putative
ingenoplastis_000102500.1 hypothetical protein, conserved
ingenoplastis_000102600.1 kinesin, putative
ingenoplastis_000102700.1 kinesin, putative
ingenoplastis_000102800.1 p1/s1 nuclease
ingenoplastis_000102900.1 hypothetical protein, conserved
ingenoplastis_000103000.1 phosphopantothenoylcysteine decarboxylase, putative
ingenoplastis_000103200.1 protein kinase, putative
ingenoplastis_000103400.1 hypothetical protein, conserved
ingenoplastis_000103500.1 hypothetical protein
ingenoplastis_000103600.1 WD domain, G-beta repeat, putative
ingenoplastis_000103700.1 hypothetical protein, conserved
ingenoplastis_000103800.1 hypothetical protein, conserved
ingenoplastis_000103900.1 hypothetical protein, conserved
ingenoplastis_000104000.1 hypothetical protein, conserved
ingenoplastis_000104100.1 Divergent CRAL/TRIO domain/CRAL/TRIO domain containing protein, putative
ingenoplastis_000104200.1 hypothetical protein
ingenoplastis_000104300.1 AAA domain (Cdc48 subfamily), putative
ingenoplastis_000104400.1 small GTP-binding protein Rab28, putative
ingenoplastis_000104500.1 hypothetical protein, conserved
ingenoplastis_000104700.1 hypothetical protein
ingenoplastis_000104800.1 hypothetical protein, conserved
ingenoplastis_000104900.1 hypothetical protein, conserved
ingenoplastis_000105000.1 Intraflagellar transport complex B protein 46 C terminal, putative
ingenoplastis_000105100.1 protein kinase, putative
ingenoplastis_000105200.1 DNAJ domain protein, putative
ingenoplastis_000105300.1 queuine tRNA-ribosyltransferase, putative
ingenoplastis_000105400.1 Flagellar-associated PapD-like, putative
ingenoplastis_000105600.1 hypothetical protein, conserved
ingenoplastis_000105700.1 splicing factor 3a, putative
ingenoplastis_000105800.1 hypothetical protein
ingenoplastis_000105900.1 hypothetical protein
ingenoplastis_000106000.1 hypothetical protein, conserved
ingenoplastis_000106100.1 ATPase family associated with various cellular activities (AAA)/AAA domain containing protein, putative
ingenoplastis_000106200.1 hypothetical protein, conserved
ingenoplastis_000106300.1 hypothetical protein, conserved
ingenoplastis_000106400.1 hypothetical protein
ingenoplastis_000106500.1 RNA pseudouridylate synthase-like protein
ingenoplastis_000106600.1 hypothetical protein
ingenoplastis_000106700.1 C2H2 type zinc-finger (2 copies), putative
ingenoplastis_000106800.1 intraflagellar transport (IFT) protein, putative
ingenoplastis_000106900.1 mannosyltransferase, putative
ingenoplastis_000107000.1 calpain-like cysteine peptidase, putative
ingenoplastis_000107100.1 Domain of unknown function (DUF814), putative
ingenoplastis_000107200.1 Aminoacyl-tRNA editing domain containing protein, putative
ingenoplastis_000107800.1 RNA recognition motif (a.k.a. RRM, RBD, or RNP domain)/RNA recognition motif. (a.k.a. RRM, RBD, or RNP domain), putative
ingenoplastis_000107900.1 RNA-binding protein, putative
ingenoplastis_000108000.1 Zinc finger C-x8-C-x5-C-x3-H type (and similar), putative
ingenoplastis_000108200.1 Uncharacterised ACR, YagE family COG1723, putative
ingenoplastis_000108300.1 zinc-finger protein, conserved
ingenoplastis_000108400.1 hypothetical protein, conserved
ingenoplastis_000108700.1 sphingosine 1-phosphate lyase
ingenoplastis_000108900.1 hypothetical protein
ingenoplastis_000109300.1 hypothetical protein, conserved
ingenoplastis_000109400.1 AAA family ATPase-like protein
ingenoplastis_000109600.1 heat shock 70-related protein 1, mitochondrial precursor, putative
ingenoplastis_000109800.1 hypothetical protein, conserved
ingenoplastis_000109900.1 formate--tetrahydrofolate ligase
ingenoplastis_000110000.1 RNA-binding protein, putative
ingenoplastis_000110100.1 hypothetical protein, conserved
ingenoplastis_000110200.1 replication factor C, subunit 2, putative
ingenoplastis_000110300.1 hypothetical protein, conserved
ingenoplastis_000110600.1 SH3 domain protein-like protein
ingenoplastis_000110700.1 hypothetical protein, conserved
ingenoplastis_000110800.1 hypothetical protein, conserved
ingenoplastis_000110900.1 hypothetical protein, conserved
ingenoplastis_000111000.1 Docking domain of Afi1 for Arf3 in vesicle trafficking/Stabilization of polarity axis, putative
ingenoplastis_000111100.1 small glutamine-rich tetratricopeptide repeat protein, putative
ingenoplastis_000111300.1 superoxide dismutase, putative
ingenoplastis_000111400.1 hypothetical protein
ingenoplastis_000111500.1 hypothetical protein, conserved
ingenoplastis_000111600.1 chaperonin HSP60/CNP60, putative
ingenoplastis_000111700.1 hypothetical protein, conserved
ingenoplastis_000111800.1 GTPase activator-like protein
ingenoplastis_000111900.1 hypothetical protein, conserved
ingenoplastis_000112000.1 hypothetical protein, conserved
ingenoplastis_000112200.1 hypothetical protein, conserved
ingenoplastis_000112300.1 aldehyde dehydrogenase, putative
ingenoplastis_000112400.1 mitogen-activated protein kinase, putative
ingenoplastis_000112700.1 Zinc-finger domain containing protein, putative
ingenoplastis_000112800.1 Glyceraldehyde 3-phosphate dehydrogenase, NAD binding domain/Glyceraldehyde 3-phosphate dehydrogenase, C-terminal domain containing protein, putative
ingenoplastis_000113000.1 Glyceraldehyde 3-phosphate dehydrogenase, NAD binding domain/Glyceraldehyde 3-phosphate dehydrogenase, C-terminal domain containing protein, putative
ingenoplastis_000113200.1 Glyceraldehyde 3-phosphate dehydrogenase, C-terminal domain containing protein, putative
ingenoplastis_000113300.1 Glyceraldehyde 3-phosphate dehydrogenase, NAD binding domain containing protein, putative
ingenoplastis_000113700.1 hypothetical protein, conserved
ingenoplastis_000113800.1 Tetratricopeptide repeat/TPR repeat, putative
ingenoplastis_000113900.1 DEAD/DEAH box helicase/Type III restriction enzyme, res subunit/Helicase conserved C-terminal domain containing protein, putative
ingenoplastis_000114200.1 Domain of unknown function DUF21, putative
ingenoplastis_000114400.1 Protein of unknown function (DUF544)/CUE domain containing protein, putative
ingenoplastis_000114500.1 protein kinase-like protein
ingenoplastis_000114600.1 tRNA (Guanine-1)-methyltransferase, putative
ingenoplastis_000114700.1 homoserine kinase, putative
ingenoplastis_000114800.1 RNA-binding protein 42 (RNA-binding motif protein 42), putative
ingenoplastis_000115000.1 S-adenosylmethionine decarboxylase
ingenoplastis_000115100.1 S-adenosylmethionine decarboxylase proenzyme- like, putative
ingenoplastis_000115200.1 valyl-tRNA synthetase, putative
ingenoplastis_000115400.1 hypothetical protein, conserved
ingenoplastis_000115500.1 Tumour suppressor, Mitostatin, putative
ingenoplastis_000115600.1 RNA recognition motif. (a.k.a. RRM, RBD, or RNP domain), putative
ingenoplastis_000115700.1 3-hydroxy-3-methylglutaryl-CoA reductase
ingenoplastis_000115800.1 ribosomal protein S26, putative
ingenoplastis_000116000.1 hypothetical protein, conserved
ingenoplastis_000116200.1 hypothetical protein, conserved
ingenoplastis_000116300.1 hypothetical protein, conserved
ingenoplastis_000116400.1 hypothetical protein, conserved
ingenoplastis_000116500.1 hypothetical protein, conserved
ingenoplastis_000116600.1 hypothetical protein, conserved
ingenoplastis_000116700.1 hypothetical protein, conserved
ingenoplastis_000116900.1 Sperm-tail PG-rich repeat, putative
ingenoplastis_000117200.1 U5 snRNA-associated splicing factor
ingenoplastis_000117400.1 hypothetical protein
ingenoplastis_000117500.1 mitochondrial carrier protein, putative
ingenoplastis_000117700.1 protein kinase A catalytic subunit isoform 1
ingenoplastis_000117800.1 amastin-like surface protein-like protein
ingenoplastis_000117900.1 amastin-like surface protein-like protein
ingenoplastis_000118000.1 amastin-like surface protein-like protein
ingenoplastis_000118100.1 amastin-like surface protein-like protein
ingenoplastis_000118200.1 amastin-like surface protein-like protein
ingenoplastis_000118300.1 amastin-like surface protein-like protein
ingenoplastis_000118400.1 transport protein particle (TRAPP) subunit, putative
ingenoplastis_000118500.1 Leucine rich repeat/Leucine-rich repeat, putative
ingenoplastis_000118600.1 ATP-dependent RNA helicase, putative
ingenoplastis_000118700.1 chaperone protein DNAj, putative
ingenoplastis_000118800.1 hypothetical protein, conserved
ingenoplastis_000118900.1 kinetoplastid kinetochore protein 3, putative
ingenoplastis_000119000.1 Regulatory subunit of type II PKA R-subunit, putative
ingenoplastis_000119100.1 Tetratricopeptide repeat, putative
ingenoplastis_000119200.1 hypothetical protein
ingenoplastis_000119300.1 Splicing factor 3B subunit 10 (SF3b10), putative
ingenoplastis_000119500.1 hypothetical protein, conserved
ingenoplastis_000119600.1 rer1 family-like protein
ingenoplastis_000119700.1 poly(A)-binding protein 2
ingenoplastis_000119800.1 hypothetical protein
ingenoplastis_000119900.1 elongation factor 1-alpha, putative
ingenoplastis_000120000.1 Protein of unknown function (DUF2009), putative
ingenoplastis_000120100.1 RNA polymerase III RPC4, putative
ingenoplastis_000120200.1 Bardet-Biedl syndrome 1 protein homolog (BBS1-like protein 1), putative
ingenoplastis_000120300.1 VMA21-like domain containing protein, putative
ingenoplastis_000120400.1 hypothetical protein
ingenoplastis_000120500.1 hypothetical protein
ingenoplastis_000121700.1 hypothetical protein, conserved
ingenoplastis_000121800.1 hypothetical protein, conserved
ingenoplastis_000121900.1 hypothetical protein, conserved
ingenoplastis_000122000.1 hypothetical protein, conserved
ingenoplastis_000122100.1 hypothetical protein, conserved
ingenoplastis_000122200.1 Elongation factor Tu domain 2/Elongation factor Tu C-terminal domain containing protein, putative
ingenoplastis_000122400.1 Elongation factor Tu GTP binding domain/Elongation factor Tu domain 2, putative
ingenoplastis_000122600.1 Elongation factor Tu GTP binding domain containing protein, putative
ingenoplastis_000122800.1 Elongation factor Tu C-terminal domain containing protein, putative
ingenoplastis_000122900.1 Elongation factor Tu domain 2/Elongation factor Tu C-terminal domain containing protein, putative
ingenoplastis_000123000.1 Endonuclease/Exonuclease/phosphatase family/Endonuclease-reverse transcriptase, putative
ingenoplastis_000123100.1 hypothetical protein, conserved
ingenoplastis_000123200.1 Reverse transcriptase (RNA-dependent DNA polymerase), putative
ingenoplastis_000123300.1 Reverse transcriptase (RNA-dependent DNA polymerase), putative
ingenoplastis_000123400.1 hypothetical protein, conserved
ingenoplastis_000123500.1 Elongation factor Tu domain 2/Elongation factor Tu C-terminal domain containing protein, putative
ingenoplastis_000123600.1 Elongation factor Tu GTP binding domain containing protein, putative
ingenoplastis_000123700.1 Elongation factor Tu C-terminal domain containing protein, putative
ingenoplastis_000123800.1 Elongation factor Tu GTP binding domain containing protein, putative
ingenoplastis_000123900.1 hypothetical protein, conserved
ingenoplastis_000124000.1 hypothetical protein, conserved
ingenoplastis_000124100.1 hypothetical protein, conserved
ingenoplastis_000124200.1 RNase H, putative
ingenoplastis_000124300.1 hypothetical protein, conserved
ingenoplastis_000124600.1 hypothetical protein, conserved
ingenoplastis_000124700.1 hypothetical protein, conserved
ingenoplastis_000124800.1 hypothetical protein, conserved
ingenoplastis_000124900.1 hypothetical protein, conserved
ingenoplastis_000125000.1 hypothetical protein, conserved
ingenoplastis_000125100.1 hypothetical protein, conserved
ingenoplastis_000125200.1 hypothetical protein, conserved
ingenoplastis_000125300.1 hypothetical protein, conserved
ingenoplastis_000125400.1 hypothetical protein, conserved
ingenoplastis_000125500.1 Predicted AAA-ATPase, putative
ingenoplastis_000125600.1 Predicted AAA-ATPase/Protein of unknown function (DUF1703), putative
ingenoplastis_000125700.1 Predicted AAA-ATPase, putative
ingenoplastis_000125800.1 hypothetical protein, conserved
ingenoplastis_000125900.1 Phage integrase family, putative
ingenoplastis_000126000.1 hypothetical protein, conserved
ingenoplastis_000126100.1 IQ calmodulin-binding motif containing protein, putative
ingenoplastis_000131800.1 hypothetical protein, conserved
ingenoplastis_000132000.1 hypothetical protein, conserved
ingenoplastis_000132400.1 Phage integrase family, putative
ingenoplastis_000132500.1 hypothetical protein, conserved
ingenoplastis_000133200.1 hypothetical protein, conserved
ingenoplastis_000133400.1 hypothetical protein
ingenoplastis_000133500.1 hypothetical protein
ingenoplastis_000133600.1 Protein phosphatase 2C, putative
ingenoplastis_000133700.1 hypothetical protein
ingenoplastis_000133800.1 hypothetical protein
ingenoplastis_000133900.1 HD domain containing protein, putative
ingenoplastis_000134000.1 HD domain containing protein, putative
ingenoplastis_000134100.1 hypothetical protein
ingenoplastis_000134200.1 hypothetical protein, conserved
ingenoplastis_000134300.1 Cyclophilin type peptidyl-prolyl cis-trans isomerase/CLD, putative
ingenoplastis_000134400.1 hypothetical protein, conserved
ingenoplastis_000134500.1 hypothetical protein
ingenoplastis_000134600.1 hypothetical protein, conserved
ingenoplastis_000134700.1 Protein kinase domain/Protein tyrosine kinase, putative
ingenoplastis_000134800.1 hypothetical protein
ingenoplastis_000134900.1 hypothetical protein
ingenoplastis_000135100.1 hypothetical protein, conserved
ingenoplastis_000135300.1 Protein kinase domain/Protein tyrosine kinase, putative
ingenoplastis_000135400.1 hypothetical protein, conserved
ingenoplastis_000135500.1 hypothetical protein, conserved
ingenoplastis_000135800.1 WD domain, G-beta repeat, putative
ingenoplastis_000136000.1 Complex 1 protein (LYR family)/Complex1_LYR-like, putative
ingenoplastis_000136100.1 hypothetical protein, conserved
ingenoplastis_000136200.1 hypothetical protein
ingenoplastis_000136400.1 LSD1 zinc finger containing protein, putative
ingenoplastis_000136500.1 fatty acid elongase, putative
ingenoplastis_000136600.1 hypothetical protein, conserved
ingenoplastis_000136700.1 Ribosomal prokaryotic L21 protein, putative
ingenoplastis_000136800.1 hypothetical protein
ingenoplastis_000136900.1 hypothetical protein, conserved
ingenoplastis_000137000.1 fatty acid elongase, putative
ingenoplastis_000137100.1 fatty acid elongase, putative
ingenoplastis_000137200.1 fatty acid elongase, putative
ingenoplastis_000137300.1 kinesin, putative
ingenoplastis_000137400.1 Domain of unknown function (DUF4201), putative
ingenoplastis_000137500.1 Protein kinase domain/Protein tyrosine kinase, putative
ingenoplastis_000137600.1 Helicase conserved C-terminal domain containing protein, putative
ingenoplastis_000137700.1 hypothetical protein
ingenoplastis_000137800.1 SNF2 family helicase-like protein, putative
ingenoplastis_000137900.1 Domain of unknown function (DUF1935), putative
ingenoplastis_000138000.1 Domain of unknown function (DUF1935), putative
ingenoplastis_000138100.1 Domain of unknown function (DUF1935), putative
ingenoplastis_000138200.1 small myristoylated protein-3, putative
ingenoplastis_000138300.1 hypothetical protein
ingenoplastis_000138400.1 hypothetical protein, conserved
ingenoplastis_000138500.1 hypothetical protein
ingenoplastis_000138600.1 hypothetical protein, conserved
ingenoplastis_000138700.1 glutathione synthetase, putative
ingenoplastis_000138900.1 tc40 antigen-like
ingenoplastis_000139100.1 RNA editing 3' terminal uridylyl transferase 1
ingenoplastis_000139200.1 hypothetical protein, conserved
ingenoplastis_000139300.1 sodium/hydrogen exchanger, putative
ingenoplastis_000139400.1 Phage integrase family, putative
ingenoplastis_000139500.1 ADP/ATP mitochondrial carrier-like protein
ingenoplastis_000139600.1 hypothetical protein
ingenoplastis_000139700.1 hypothetical protein, conserved
ingenoplastis_000139800.1 hypothetical protein, conserved
ingenoplastis_000140000.1 hypothetical protein, conserved
ingenoplastis_000140200.1 protein kinase, putative
ingenoplastis_000140300.1 5'-3' exoribonuclease D, putative
ingenoplastis_000140400.1 hypothetical protein, conserved
ingenoplastis_000140500.1 kinesin K39, putative
ingenoplastis_000140600.1 kinesin K39, putative
ingenoplastis_000140700.1 WD domain, G-beta repeat, putative
ingenoplastis_000140800.1 Enolase, C-terminal TIM barrel domain/Methylaspartate ammonia-lyase C-terminus/Enolase C-terminal domain-like, putative
ingenoplastis_000140900.1 Enolase, C-terminal TIM barrel domain/Methylaspartate ammonia-lyase C-terminus/Enolase C-terminal domain-like, putative
ingenoplastis_000141000.1 hypothetical protein
ingenoplastis_000141100.1 Enolase, C-terminal TIM barrel domain/Methylaspartate ammonia-lyase C-terminus/Enolase C-terminal domain-like, putative
ingenoplastis_000141200.1 Enolase, C-terminal TIM barrel domain/Methylaspartate ammonia-lyase C-terminus/Enolase C-terminal domain-like, putative
ingenoplastis_000141300.1 hypothetical protein, conserved
ingenoplastis_000141400.1 Enolase, C-terminal TIM barrel domain/Methylaspartate ammonia-lyase C-terminus/Enolase C-terminal domain-like, putative
ingenoplastis_000141500.1 hypothetical protein, conserved
ingenoplastis_000141600.1 Enolase, C-terminal TIM barrel domain/Methylaspartate ammonia-lyase C-terminus/Enolase C-terminal domain-like, putative
ingenoplastis_000142000.1 Enolase, N-terminal domain containing protein, putative
ingenoplastis_000142100.1 Enolase, C-terminal TIM barrel domain containing protein, putative
ingenoplastis_000142200.1 Enolase, C-terminal TIM barrel domain containing protein, putative
ingenoplastis_000142400.1 enolase
ingenoplastis_000143000.1 Enolase, N-terminal domain/Enolase, C-terminal TIM barrel domain containing protein, putative
ingenoplastis_000143100.1 Enolase, C-terminal TIM barrel domain containing protein, putative
ingenoplastis_000143200.1 ras-like small GTPases, putative
ingenoplastis_000143400.1 isocitrate dehydrogenase [NADP], mitochondrial precursor, putative
ingenoplastis_000143500.1 YjeF-related protein N-terminus/Carbohydrate kinase, putative
ingenoplastis_000143600.1 phosphatidylserine synthase, putative
ingenoplastis_000143700.1 NLI interacting factor-like phosphatase, putative
ingenoplastis_000143900.1 RNA recognition motif. (a.k.a. RRM, RBD, or RNP domain)/RNA recognition motif (a.k.a. RRM, RBD, or RNP domain), putative
ingenoplastis_000144000.1 hypothetical protein, conserved
ingenoplastis_000144100.1 hypothetical protein
ingenoplastis_000144200.1 hypothetical protein, conserved
ingenoplastis_000144300.1 ubiquitin/ribosomal protein S27a, putative
ingenoplastis_000144400.1 hypothetical protein, conserved
ingenoplastis_000144500.1 hypothetical protein, conserved
ingenoplastis_000144600.1 hypothetical protein
ingenoplastis_000144700.1 hypothetical protein, conserved
ingenoplastis_000144800.1 serine hydroxymethyltransferase (SHMT-L)
ingenoplastis_000144900.1 TPR repeat/DnaJ domain containing protein, putative
ingenoplastis_000145100.1 hypothetical protein
ingenoplastis_000145200.1 endoribonuclease L-PSP (pb5), putative
ingenoplastis_000145300.1 protein kinase, putative
ingenoplastis_000145400.1 Reverse transcriptase (RNA-dependent DNA polymerase), putative
ingenoplastis_000145500.1 tyrosyl-tRNA synthetase, putative
ingenoplastis_000145600.1 hypothetical protein, conserved
ingenoplastis_000145700.1 protein kinase, putative
ingenoplastis_000145800.1 hypothetical protein, conserved
ingenoplastis_000145900.1 WD domain, G-beta repeat, putative
ingenoplastis_000146000.1 hypothetical protein, conserved
ingenoplastis_000146500.1 hypothetical protein, conserved
ingenoplastis_000146600.1 hypothetical protein, conserved
ingenoplastis_000146700.1 Phage integrase family, putative
ingenoplastis_000146800.1 chaperone protein DNAJ-like protein
ingenoplastis_000147000.1 conserved protein, unknown function
ingenoplastis_000147100.1 MORN repeat, putative
ingenoplastis_000147300.1 DNA-directed RNA polymerase 2, RPB12 subunit, putative
ingenoplastis_000147500.1 zeta tubulin, putative
ingenoplastis_000147600.1 Transmembrane protein 231, putative
ingenoplastis_000147700.1 glycerol-3-phosphate dehydrogenase-like protein
ingenoplastis_000147800.1 ribosomal RNA-processing protein 8, putative
ingenoplastis_000147900.1 conserved protein, unknown function
ingenoplastis_000148000.1 hypothetical protein
ingenoplastis_000148100.1 TFIIH basal transcription factor subunit, putative
ingenoplastis_000148200.1 Cell cycle checkpoint protein RAD1-like, putative
ingenoplastis_000148500.1 Major Facilitator Superfamily/Sugar (and other) transporter, putative
ingenoplastis_000148600.1 hypothetical protein, conserved
ingenoplastis_000148700.1 hypothetical protein
ingenoplastis_000148800.1 hypothetical protein, conserved
ingenoplastis_000148900.1 leucine-rich repeat-containing protein
ingenoplastis_000149000.1 E3 ubiquitin-protein ligase KCMF1, putative
ingenoplastis_000149300.1 hypothetical protein, conserved
ingenoplastis_000149400.1 hypothetical protein, conserved
ingenoplastis_000149600.1 deoxyhypusine synthase, putative
ingenoplastis_000149700.1 transmembrane protein, putative
ingenoplastis_000149800.1 hypothetical protein, conserved
ingenoplastis_000149900.1 kelch domain-containing protein
ingenoplastis_000150000.1 hypothetical protein
ingenoplastis_000150100.1 hypothetical protein
ingenoplastis_000150200.1 hypothetical protein
ingenoplastis_000150300.1 leucine-rich repeat-containing protein
ingenoplastis_000150400.1 hypothetical protein
ingenoplastis_000150500.1 hypothetical protein, conserved
ingenoplastis_000150600.1 phosphatidylinositol-4-phosphate 5-kinase related
ingenoplastis_000150700.1 NADH-ubiquinone oxidoreductase complex I subunit, putative
ingenoplastis_000150900.1 phosphoglycerate kinase C, glycosomal
ingenoplastis_000151100.1 hypothetical protein
ingenoplastis_000151300.1 hypothetical protein, conserved
ingenoplastis_000151400.1 hypothetical protein, conserved
ingenoplastis_000151500.1 DNA repair protein BRCA2, putative
ingenoplastis_000151700.1 phosphate-Repressible Phosphate Permease-like protein
ingenoplastis_000151900.1 Major Facilitator Superfamily/Nodulin-like, putative
ingenoplastis_000152400.1 hypothetical protein, conserved
ingenoplastis_000152500.1 Reticulon, putative
ingenoplastis_000152600.1 Reticulon, putative
ingenoplastis_000152700.1 Reticulon, putative
ingenoplastis_000152800.1 Reticulon, putative
ingenoplastis_000152900.1 Reticulon, putative
ingenoplastis_000153000.1 Reticulon, putative
ingenoplastis_000153100.1 Reticulon, putative
ingenoplastis_000153200.1 Reticulon, putative
ingenoplastis_000153300.1 Reticulon, putative
ingenoplastis_000153400.1 Reticulon, putative
ingenoplastis_000153600.1 Chromatin assembly factor 1 subunit A, putative
ingenoplastis_000153700.1 hypothetical protein, conserved
ingenoplastis_000154000.1 hypothetical protein, conserved
ingenoplastis_000154100.1 Reverse transcriptase (RNA-dependent DNA polymerase), putative
ingenoplastis_000154800.1 hypothetical protein, conserved
ingenoplastis_000155000.1 hypothetical protein, conserved
ingenoplastis_000155100.1 Putative integral membrane protein conserved region (DUF2404), putative
ingenoplastis_000155200.1 cyclin 1
ingenoplastis_000155400.1 pfkB family carbohydrate kinase, putative
ingenoplastis_000155500.1 hypothetical protein, conserved
ingenoplastis_000155600.1 hypothetical protein
ingenoplastis_000155700.1 hypothetical protein
ingenoplastis_000155800.1 leucine-rich repeat protein, putative
ingenoplastis_000155900.1 hypothetical protein
ingenoplastis_000156000.1 hypothetical protein
ingenoplastis_000156100.1 aspartate--ammonia ligase, putative
ingenoplastis_000156200.1 hypothetical protein, conserved
ingenoplastis_000156300.1 hypothetical protein, conserved
ingenoplastis_000156400.1 Phage integrase family, putative
ingenoplastis_000156500.1 hypothetical protein, conserved
ingenoplastis_000156600.1 hypothetical protein, conserved
ingenoplastis_000156700.1 hypothetical protein, conserved
ingenoplastis_000156800.1 hypothetical protein, conserved
ingenoplastis_000156900.1 hypothetical protein
ingenoplastis_000157000.1 hypothetical protein
ingenoplastis_000157100.1 hypothetical protein
ingenoplastis_000157200.1 hypothetical protein
ingenoplastis_000157300.1 hypothetical protein
ingenoplastis_000157400.1 TPR repeat/Tetratricopeptide repeat, putative
ingenoplastis_000157500.1 hypothetical protein
ingenoplastis_000157600.1 hypothetical protein
ingenoplastis_000157700.1 tyrosine phosphatase, putative
ingenoplastis_000157800.1 kinetoplastid kinetochore protein 10, putative
ingenoplastis_000157900.1 hypothetical protein
ingenoplastis_000158000.1 hypothetical protein
ingenoplastis_000158100.1 hypothetical protein
ingenoplastis_000158200.1 hypothetical protein
ingenoplastis_000158300.1 hypothetical protein, conserved
ingenoplastis_000158400.1 hypothetical protein, conserved
ingenoplastis_000158600.1 hypothetical protein
ingenoplastis_000158700.1 hypothetical protein
ingenoplastis_000158800.1 hypothetical protein
ingenoplastis_000158900.1 hypothetical protein
ingenoplastis_000159000.1 hypothetical protein
ingenoplastis_000159100.1 hypothetical protein, conserved
ingenoplastis_000159200.1 DNA photolyase, putative
ingenoplastis_000159300.1 Ring finger domain/Zinc finger, C3HC4 type (RING finger) containing protein, putative
ingenoplastis_000159400.1 hypothetical protein
ingenoplastis_000159500.1 cdc2-related kinase 12
ingenoplastis_000159600.1 hypothetical protein
ingenoplastis_000159700.1 kinesin, putative
ingenoplastis_000159800.1 integral membrane transport protein, putative
ingenoplastis_000160000.1 DNA replication licensing factor MCM4, putative
ingenoplastis_000160200.1 ATP-dependent protease ATPase subunit HslU2
ingenoplastis_000160300.1 catalytic subunit of the vacuolar transporter chaperone 4, putative
ingenoplastis_000160400.1 Domain of unknown function (DUF4586), putative
ingenoplastis_000160500.1 hypothetical protein, conserved
ingenoplastis_000160600.1 FHA domain/Zinc finger, C3HC4 type (RING finger) containing protein, putative
ingenoplastis_000160700.1 kinesin, putative
ingenoplastis_000160800.1 hypothetical protein, conserved
ingenoplastis_000160900.1 calmodulin-like protein containing EF hand domain
ingenoplastis_000161000.1 RNA helicase, putative
ingenoplastis_000161600.1 hypothetical protein, conserved
ingenoplastis_000161700.1 hypothetical protein, conserved
ingenoplastis_000161800.1 hypothetical protein, conserved
ingenoplastis_000161900.1 hypothetical protein, conserved
ingenoplastis_000162000.1 hypothetical protein, conserved
ingenoplastis_000162100.1 glucose transporter 2
ingenoplastis_000162200.1 pteridine transporter (truncated), putative
ingenoplastis_000162300.1 hypothetical protein, conserved
ingenoplastis_000162400.1 hypothetical protein, conserved
ingenoplastis_000162500.1 hypothetical protein, conserved
ingenoplastis_000162600.1 hypothetical protein, conserved
ingenoplastis_000162700.1 hypothetical protein, conserved
ingenoplastis_000162800.1 hypothetical protein, conserved
ingenoplastis_000162900.1 hypothetical protein, conserved
ingenoplastis_000163000.1 hypothetical protein, conserved
ingenoplastis_000163100.1 hypothetical protein, conserved
ingenoplastis_000163200.1 hypothetical protein, conserved
ingenoplastis_000163300.1 hypothetical protein, conserved
ingenoplastis_000163400.1 hypothetical protein, conserved
ingenoplastis_000163500.1 hypothetical protein, conserved
ingenoplastis_000163600.1 hypothetical protein, conserved
ingenoplastis_000163700.1 hypothetical protein, conserved
ingenoplastis_000163800.1 hypothetical protein, conserved
ingenoplastis_000163900.1 hypothetical protein, conserved
ingenoplastis_000164000.1 hypothetical protein, conserved
ingenoplastis_000164100.1 hypothetical protein, conserved
ingenoplastis_000164200.1 hypothetical protein, conserved
ingenoplastis_000164300.1 Adenylate and Guanylate cyclase catalytic domain containing protein, putative
ingenoplastis_000164400.1 hypothetical protein, conserved
ingenoplastis_000164500.1 hypothetical protein, conserved
ingenoplastis_000164600.1 hypothetical protein, conserved
ingenoplastis_000164700.1 hypothetical protein, conserved
ingenoplastis_000164800.1 hypothetical protein, conserved
ingenoplastis_000164900.1 hypothetical protein, conserved
ingenoplastis_000165000.1 hypothetical protein, conserved
ingenoplastis_000165100.1 hypothetical protein, conserved
ingenoplastis_000165200.1 hypothetical protein, conserved
ingenoplastis_000165300.1 hypothetical protein, conserved
ingenoplastis_000165400.1 hypothetical protein, conserved
ingenoplastis_000165500.1 hypothetical protein, conserved
ingenoplastis_000165600.1 hypothetical protein, conserved
ingenoplastis_000165700.1 hypothetical protein, conserved
ingenoplastis_000165800.1 hypothetical protein, conserved
ingenoplastis_000166100.1 protein kinase, putative
ingenoplastis_000166400.1 hypothetical protein, conserved
ingenoplastis_000166500.1 hypothetical protein, conserved
ingenoplastis_000166600.1 protein disulfide isomerase
ingenoplastis_000166800.1 protein disulfide isomerase
ingenoplastis_000166900.1 hypothetical protein, conserved
ingenoplastis_000167000.1 kinesin, putative
ingenoplastis_000167100.1 G-patch domain/DExH-box splicing factor binding site, putative
ingenoplastis_000167300.1 hypothetical protein, conserved
ingenoplastis_000167400.1 hypothetical protein, conserved
ingenoplastis_000167500.1 Leucine rich repeat, putative
ingenoplastis_000167600.1 Domain of unknown function (DUF3883), putative
ingenoplastis_000167800.1 TLD, putative
ingenoplastis_000167900.1 2,4-dienoyl-coa reductase-like protein
ingenoplastis_000168000.1 hypothetical protein, conserved
ingenoplastis_000168100.1 Peptidyl-tRNA hydrolase PTH2, putative
ingenoplastis_000168200.1 hypothetical protein
ingenoplastis_000168400.1 AN1-like Zinc finger containing protein, putative
ingenoplastis_000168500.1 ARM-like helical domain-containing protein
ingenoplastis_000168600.1 dihydrofolate reductase-thymidylate synthase
ingenoplastis_000168700.1 hypothetical protein, conserved
ingenoplastis_000168800.1 hypothetical protein
ingenoplastis_000168900.1 hypothetical protein, conserved
ingenoplastis_000169000.1 lipin, putative
ingenoplastis_000169100.1 hypothetical protein
ingenoplastis_000169200.1 hypothetical protein, conserved
ingenoplastis_000169300.1 hypothetical protein
ingenoplastis_000169400.1 hypothetical protein
ingenoplastis_000169500.1 hypothetical protein
ingenoplastis_000169600.1 hypothetical protein
ingenoplastis_000169700.1 serine-threonine dehydratase, putative
ingenoplastis_000169800.1 hypothetical protein
ingenoplastis_000169900.1 YEATS family, putative
ingenoplastis_000170000.1 C2 domain/Ankyrin repeats (3 copies)/Ankyrin repeat, putative
ingenoplastis_000170100.1 hypothetical protein
ingenoplastis_000170200.1 hypothetical protein
ingenoplastis_000170300.1 hypothetical protein, conserved
ingenoplastis_000170400.1 hypothetical protein
ingenoplastis_000170500.1 lanosterol synthase, putative
ingenoplastis_000170600.1 protein kinase, putative
ingenoplastis_000170700.1 hypothetical protein, conserved
ingenoplastis_000170800.1 Putative Phosphatase/Protein of unknown function DUF89, putative
ingenoplastis_000170900.1 Carbonic anhydrase, putative
ingenoplastis_000171000.1 carbonic anhydrase family protein, putative
ingenoplastis_000171100.1 hypothetical protein, conserved
ingenoplastis_000171200.1 hypothetical protein
ingenoplastis_000171300.1 60S ribosomal protein L23a, putative
ingenoplastis_000171400.1 60S ribosomal protein L23a, putative
ingenoplastis_000171700.1 hypothetical protein, conserved
ingenoplastis_000171800.1 zinc binding dehydrogenase-like protein
ingenoplastis_000171900.1 hypothetical protein
ingenoplastis_000172000.1 hypothetical protein
ingenoplastis_000172200.1 thymidylate kinase-like protein
ingenoplastis_000172300.1 ribosomal protein l35a, putative
ingenoplastis_000172400.1 hypothetical protein, conserved
ingenoplastis_000172500.1 mutt/nudix family protein-like protein
ingenoplastis_000172600.1 PSP1 C-terminal conserved region containing protein, putative
ingenoplastis_000172700.1 hypothetical protein, conserved
ingenoplastis_000172800.1 hypothetical protein
ingenoplastis_000172900.1 DEAD/DEAH box helicase, putative
ingenoplastis_000173000.1 hypothetical protein, conserved
ingenoplastis_000173100.1 hypothetical protein
ingenoplastis_000173200.1 guanosine diphosphatase, putative
ingenoplastis_000173300.1 leucine-rich repeat protein, putative
ingenoplastis_000173400.1 hypothetical protein
ingenoplastis_000173500.1 MORN repeat, putative
ingenoplastis_000173600.1 Mitogen-activated protein kinase 10, putative
ingenoplastis_000173700.1 Nucleolar protein 56, putative
ingenoplastis_000173800.1 hypothetical protein
ingenoplastis_000173900.1 Amastin surface glycoprotein, putative
ingenoplastis_000174000.1 hypothetical protein
ingenoplastis_000174100.1 Exonuclease, putative
ingenoplastis_000174200.1 hypothetical protein, conserved
ingenoplastis_000174300.1 Amastin surface glycoprotein, putative
ingenoplastis_000174400.1 hypothetical protein, conserved
ingenoplastis_000174500.1 hypothetical protein, conserved
ingenoplastis_000174900.1 hypothetical protein, conserved
ingenoplastis_000175000.1 hypothetical protein, conserved
ingenoplastis_000175100.1 hypothetical protein, conserved
ingenoplastis_000175200.1 hypothetical protein, conserved
ingenoplastis_000175300.1 hypothetical protein, conserved
ingenoplastis_000175700.1 Reverse transcriptase (RNA-dependent DNA polymerase), putative
ingenoplastis_000175800.1 Reverse transcriptase (RNA-dependent DNA polymerase), putative
ingenoplastis_000175900.1 hypothetical protein, conserved
ingenoplastis_000176000.1 Sugar (and other) transporter/Major Facilitator Superfamily, putative
ingenoplastis_000176100.1 Sugar (and other) transporter/Major Facilitator Superfamily, putative
ingenoplastis_000176200.1 surface protein amastin, putative
ingenoplastis_000176400.1 hypothetical protein, conserved
ingenoplastis_000176800.1 surface protein amastin, putative
ingenoplastis_000177000.1 surface protein amastin, putative
ingenoplastis_000177100.1 Predicted AAA-ATPase, putative
ingenoplastis_000177200.1 hypothetical protein, conserved
ingenoplastis_000177300.1 hypothetical protein, conserved
ingenoplastis_000177400.1 Predicted AAA-ATPase, putative
ingenoplastis_000177500.1 hypothetical protein, conserved
ingenoplastis_000177600.1 hypothetical protein, conserved
ingenoplastis_000177700.1 hypothetical protein, conserved
ingenoplastis_000177800.1 Predicted AAA-ATPase, putative
ingenoplastis_000177900.1 hypothetical protein, conserved
ingenoplastis_000178000.1 hypothetical protein, conserved
ingenoplastis_000178100.1 hypothetical protein, conserved
ingenoplastis_000178200.1 hypothetical protein, conserved
ingenoplastis_000178700.1 pumilio/PUF RNA binding protein 5, putative
ingenoplastis_000178800.1 hypothetical protein
ingenoplastis_000179000.1 ATP-binding cassette protein subfamily G, member 1, putative
ingenoplastis_000179100.1 hypothetical protein, conserved
ingenoplastis_000179200.1 Cyclophilin type peptidyl-prolyl cis-trans isomerase/CLD, putative
ingenoplastis_000179300.1 cyclophilin 2
ingenoplastis_000179400.1 cyclophilin 2
ingenoplastis_000179500.1 Domain of unknown function (DUF1768), putative
ingenoplastis_000179600.1 20S proteasome beta 6 subunit, putative
ingenoplastis_000179700.1 hypothetical protein, conserved
ingenoplastis_000179800.1 HD domain containing protein, putative
ingenoplastis_000179900.1 hypothetical protein, conserved
ingenoplastis_000180000.1 kinesin-like protein
ingenoplastis_000180100.1 hypothetical protein, conserved
ingenoplastis_000180200.1 hypothetical protein, conserved
ingenoplastis_000180400.1 hypothetical protein, conserved
ingenoplastis_000180500.1 FHA domain containing protein, putative
ingenoplastis_000180600.1 hypothetical protein, conserved
ingenoplastis_000180700.1 hypothetical protein
ingenoplastis_000180800.1 5'-3' exoribonuclease A, putative
ingenoplastis_000180900.1 hypothetical protein, conserved
ingenoplastis_000181000.1 hypothetical protein, conserved
ingenoplastis_000181100.1 ribonuclease H1, putative
ingenoplastis_000181200.1 MYND finger domain-like protein
ingenoplastis_000181300.1 hypothetical protein
ingenoplastis_000181400.1 hypothetical protein, conserved
ingenoplastis_000181500.1 serine peptidase, clan SC, family S9A-like protein
ingenoplastis_000181600.1 NAD(P)-dependent steroid dehydrogenase protein, putative
ingenoplastis_000181700.1 glutamine synthetase, putative
ingenoplastis_000181800.1 Zinc finger C-x8-C-x5-C-x3-H type (and similar), putative
ingenoplastis_000182000.1 glutamine synthetase, putative
ingenoplastis_000182100.1 ATP-binding cassette subfamily A, member 1, putative
ingenoplastis_000182200.1 Glutamine synthetase, beta-Grasp domain/Glutamine synthetase, catalytic domain containing protein, putative
ingenoplastis_000182300.1 hypothetical protein
ingenoplastis_000182400.1 hypothetical protein
ingenoplastis_000182500.1 hypothetical protein
ingenoplastis_000182600.1 hypothetical protein, conserved
ingenoplastis_000182900.1 hypothetical protein, conserved
ingenoplastis_000183100.1 hypothetical protein, conserved
ingenoplastis_000183200.1 hypothetical protein, conserved
ingenoplastis_000183300.1 hypothetical protein, conserved
ingenoplastis_000183400.1 hypothetical protein
ingenoplastis_000183500.1 Amastin surface glycoprotein, putative
ingenoplastis_000183600.1 Amastin surface glycoprotein, putative
ingenoplastis_000183700.1 ATP-NAD kinase-like protein
ingenoplastis_000183900.1 hypothetical protein, conserved
ingenoplastis_000184000.1 hypothetical protein, conserved
ingenoplastis_000184100.1 hypothetical protein
ingenoplastis_000184200.1 hypothetical protein, conserved
ingenoplastis_000184300.1 Amastin surface glycoprotein, putative
ingenoplastis_000184400.1 Amastin surface glycoprotein, putative
ingenoplastis_000184500.1 Amastin surface glycoprotein, putative
ingenoplastis_000184600.1 Amastin surface glycoprotein, putative
ingenoplastis_000184700.1 Amastin surface glycoprotein, putative
ingenoplastis_000184800.1 Amastin surface glycoprotein, putative
ingenoplastis_000184900.1 Amastin surface glycoprotein, putative
ingenoplastis_000185000.1 Amastin surface glycoprotein, putative
ingenoplastis_000185100.1 Amastin surface glycoprotein, putative
ingenoplastis_000185200.1 Amastin surface glycoprotein, putative
ingenoplastis_000185300.1 Amastin surface glycoprotein, putative
ingenoplastis_000185400.1 Amastin surface glycoprotein, putative
ingenoplastis_000185500.1 Amastin surface glycoprotein, putative
ingenoplastis_000185600.1 Zinc-finger of the MIZ type in Nse subunit/U-box domain containing protein, putative
ingenoplastis_000185700.1 U-box domain containing protein, putative
ingenoplastis_000186300.1 hypothetical protein, conserved
ingenoplastis_000186400.1 tyrosyl or methionyl-tRNA synthetase-like protein
ingenoplastis_000186500.1 Polyketide cyclase / dehydrase and lipid transport, putative
ingenoplastis_000186600.1 hypothetical protein, conserved
ingenoplastis_000186700.1 hypothetical protein
ingenoplastis_000186800.1 hypothetical protein
ingenoplastis_000186900.1 hypothetical protein
ingenoplastis_000187100.1 hypothetical protein, conserved
ingenoplastis_000187200.1 hypothetical protein, conserved
ingenoplastis_000187300.1 dynein light chain, putative
ingenoplastis_000187400.1 hypothetical protein, conserved
ingenoplastis_000187500.1 hypothetical protein
ingenoplastis_000187600.1 Nucleolar protein,Nop52, putative
ingenoplastis_000187700.1 protein kinase, putative
ingenoplastis_000187800.1 hypothetical protein
ingenoplastis_000187900.1 hypothetical protein
ingenoplastis_000188000.1 Iron-sulfur assembly protein 1, putative
ingenoplastis_000188100.1 hypothetical protein
ingenoplastis_000188200.1 hypothetical protein
ingenoplastis_000188300.1 hypothetical protein, conserved
ingenoplastis_000188400.1 hypothetical protein, conserved
ingenoplastis_000188500.1 Membrane transport protein, putative
ingenoplastis_000188600.1 hypothetical protein, conserved
ingenoplastis_000188700.1 Membrane transport protein, putative
ingenoplastis_000188800.1 hypothetical protein
ingenoplastis_000188900.1 hypothetical protein, conserved
ingenoplastis_000189000.1 hypothetical protein, conserved
ingenoplastis_000189100.1 hypothetical protein
ingenoplastis_000189200.1 adenylate cyclase regulatory protein-like protein
ingenoplastis_000189300.1 Carbonic anhydrase, putative
ingenoplastis_000189400.1 N-terminal region of Chorein, a TM vesicle-mediated sorter, putative
ingenoplastis_000189500.1 hypothetical protein
ingenoplastis_000189600.1 transaldolase, putative
ingenoplastis_000189700.1 transaldolase, putative
ingenoplastis_000189800.1 transaldolase, putative
ingenoplastis_000189900.1 ubiquitin hydrolase, putative
ingenoplastis_000190000.1 hypothetical protein
ingenoplastis_000190100.1 hypothetical protein
ingenoplastis_000190200.1 hypothetical protein
ingenoplastis_000190300.1 Eukaryotic translation initiation factor eIF2A, putative
ingenoplastis_000190400.1 apurinic/apyrimidinic endonuclease-redox protein
ingenoplastis_000190500.1 hypothetical protein
ingenoplastis_000190600.1 hypothetical protein
ingenoplastis_000190700.1 hypothetical protein
ingenoplastis_000190800.1 hypothetical protein
ingenoplastis_000190900.1 Rhodanese-like domain containing protein, putative
ingenoplastis_000191000.1 Rhodanese-like domain containing protein, putative
ingenoplastis_000191100.1 Rhodanese-like domain containing protein, putative
ingenoplastis_000191200.1 Rhodanese-like domain containing protein, putative
ingenoplastis_000191300.1 Rhodanese-like domain containing protein, putative
ingenoplastis_000191400.1 Rhodanese-like domain containing protein, putative
ingenoplastis_000191500.1 Rhodanese-like domain containing protein, putative
ingenoplastis_000191600.1 Rhodanese-like domain containing protein, putative
ingenoplastis_000191700.1 Rhodanese-like domain containing protein, putative
ingenoplastis_000191800.1 Rhodanese-like domain containing protein, putative
ingenoplastis_000191900.1 Rhodanese-like domain containing protein, putative
ingenoplastis_000192000.1 hypothetical protein, conserved
ingenoplastis_000192100.1 Ring finger domain/RING-H2 zinc finger/Zinc finger, C3HC4 type (RING finger) containing protein, putative
ingenoplastis_000192200.1 RNA recognition motif. (a.k.a. RRM, RBD, or RNP domain)/RNA recognition motif (a.k.a. RRM, RBD, or RNP domain), putative
ingenoplastis_000192300.1 meiotic recombination protein SPO11, putative
ingenoplastis_000192400.1 AAA domain containing protein, putative
ingenoplastis_000192500.1 hypothetical protein, conserved
ingenoplastis_000192600.1 hypothetical protein, conserved
ingenoplastis_000192700.1 carbamoyl-phosphate synthase, putative
ingenoplastis_000192800.1 dihydroorotase, putative
ingenoplastis_000192900.1 orotidine-5-phosphate decarboxylase/orotate phosphoribosyltransferase, putative
ingenoplastis_000193000.1 aspartate carbamoyltransferase, putative
ingenoplastis_000193100.1 dihydroorotate dehydrogenase (fumarate)
ingenoplastis_000193200.1 hypothetical protein, conserved
ingenoplastis_000193300.1 hypothetical protein
ingenoplastis_000193400.1 hypothetical protein, conserved
ingenoplastis_000193500.1 hypothetical protein, conserved
ingenoplastis_000193600.1 hypothetical protein
ingenoplastis_000193700.1 fucose kinase, putative
ingenoplastis_000193800.1 Pyridoxal-dependent decarboxylase conserved domain containing protein, putative
ingenoplastis_000193900.1 hypothetical protein, conserved
ingenoplastis_000194000.1 hypothetical protein, conserved
ingenoplastis_000194100.1 expression-site associated gene (ESAG3), putative
ingenoplastis_000194200.1 hypothetical protein, conserved
ingenoplastis_000194300.1 Phage integrase family, putative
ingenoplastis_000194400.1 hypothetical protein, conserved
ingenoplastis_000194500.1 hypothetical protein, conserved
ingenoplastis_000194600.1 Reverse transcriptase (RNA-dependent DNA polymerase), putative
ingenoplastis_000195000.1 hypothetical protein, conserved
ingenoplastis_000195300.1 hypothetical protein, conserved
ingenoplastis_000195400.1 hypothetical protein, conserved
ingenoplastis_000195500.1 hypothetical protein, conserved
ingenoplastis_000195600.1 hypothetical protein, conserved
ingenoplastis_000195700.1 hypothetical protein, conserved
ingenoplastis_000195800.1 Phage integrase family, putative
ingenoplastis_000195900.1 hypothetical protein, conserved
ingenoplastis_000196000.1 hypothetical protein
ingenoplastis_000196200.1 hypothetical protein, conserved
ingenoplastis_000196300.1 hypothetical protein, conserved
ingenoplastis_000196400.1 hypothetical protein, conserved
ingenoplastis_000196500.1 hypothetical protein, conserved
ingenoplastis_000196600.1 hypothetical protein, conserved
ingenoplastis_000196700.1 hypothetical protein, conserved
ingenoplastis_000196800.1 Phage integrase family, putative
ingenoplastis_000196900.1 hypothetical protein, conserved
ingenoplastis_000197000.1 hypothetical protein, conserved
ingenoplastis_000197100.1 Phage integrase family, putative
ingenoplastis_000197200.1 hypothetical protein, conserved
ingenoplastis_000197300.1 hypothetical protein, conserved
ingenoplastis_000197400.1 hypothetical protein, conserved
ingenoplastis_000197500.1 hypothetical protein, conserved
ingenoplastis_000197600.1 hypothetical protein, conserved
ingenoplastis_000197700.1 hypothetical protein, conserved
ingenoplastis_000197800.1 hypothetical protein
ingenoplastis_000197900.1 metallo-peptidase, Clan MA(E), Family M3
ingenoplastis_000198100.1 methylmalonyl-coa epimerase-like protein
ingenoplastis_000198200.1 hypothetical protein
ingenoplastis_000198300.1 methylmalonyl-coa epimerase-like protein
ingenoplastis_000198400.1 hypothetical protein
ingenoplastis_000198500.1 Ankyrin repeats (many copies), putative
ingenoplastis_000198600.1 hypothetical protein
ingenoplastis_000198700.1 Protein kinase domain/Protein tyrosine kinase/Kinase-like, putative
ingenoplastis_000198800.1 hypothetical protein, conserved
ingenoplastis_000198900.1 hypothetical protein, conserved
ingenoplastis_000199000.1 hypothetical protein, conserved
ingenoplastis_000199100.1 hypothetical protein, conserved
ingenoplastis_000199200.1 hypothetical protein, conserved
ingenoplastis_000199300.1 Ankyrin repeats (3 copies), putative
ingenoplastis_000199400.1 hypothetical protein, conserved
ingenoplastis_000199500.1 hypothetical protein, conserved
ingenoplastis_000199600.1 protein kinase, putative
ingenoplastis_000199700.1 hypothetical protein, conserved
ingenoplastis_000199800.1 hypothetical protein
ingenoplastis_000199900.1 hypothetical protein
ingenoplastis_000200000.1 protein kinase, putative
ingenoplastis_000200100.1 Dpy-30 motif containing protein, putative
ingenoplastis_000200200.1 Protein of unknown function (DUF2453), putative
ingenoplastis_000200300.1 DnaJ domain containing protein, putative
ingenoplastis_000200400.1 cathepsin L-like protease
ingenoplastis_000200600.1 cathepsin L-like protease
ingenoplastis_000200700.1 Protein tyrosine kinase/Protein kinase domain containing protein, putative
ingenoplastis_000200900.1 hypothetical protein, conserved
ingenoplastis_000201000.1 stress-induced protein sti1
ingenoplastis_000201200.1 phosphoribosylpyrophosphate synthetase
ingenoplastis_000201300.1 Exocyst complex component Sec3, putative
ingenoplastis_000201500.1 Thiopurine S-methyltransferase (TPMT), putative
ingenoplastis_000201600.1 Putative intraflagellar transport protein D4
ingenoplastis_000201700.1 hypothetical protein, conserved
ingenoplastis_000201800.1 Zinc finger, C3HC4 type (RING finger) containing protein, putative
ingenoplastis_000201900.1 Ankyrin repeats (3 copies), putative
ingenoplastis_000202000.1 hypothetical protein, conserved
ingenoplastis_000202100.1 centrin-4, putative
ingenoplastis_000202200.1 hypothetical protein, conserved
ingenoplastis_000202300.1 Beta-lactamase superfamily domain containing protein, putative
ingenoplastis_000202500.1 mitochondrial DNA polymerase beta
ingenoplastis_000202600.1 SET domain containing protein, putative
ingenoplastis_000202800.1 hypothetical protein, conserved
ingenoplastis_000202900.1 hypothetical protein, conserved
ingenoplastis_000203000.1 U-box domain containing protein, putative
ingenoplastis_000203300.1 pteridine transporter (truncated), putative
ingenoplastis_000203400.1 pteridine transporter (truncated), putative
ingenoplastis_000203500.1 hypothetical protein, conserved
ingenoplastis_000203600.1 HECT-domain (ubiquitin-transferase), putative
ingenoplastis_000203700.1 hypothetical protein
ingenoplastis_000203900.1 hypothetical protein, conserved
ingenoplastis_000204000.1 ascorbate peroxidase
ingenoplastis_000204100.1 glucose-6-phosphate 1-dehydrogenase, putative
ingenoplastis_000204200.1 glucose-6-phosphate 1-dehydrogenase, putative
ingenoplastis_000204300.1 HPP family, putative
ingenoplastis_000204400.1 HPP family, putative
ingenoplastis_000204500.1 HPP family, putative
ingenoplastis_000204600.1 HPP family, putative
ingenoplastis_000204700.1 HPP family, putative
ingenoplastis_000204800.1 Protein tyrosine kinase/Protein kinase domain/Kinase-like, putative
ingenoplastis_000204900.1 PrimPol-like protein 2, putative
ingenoplastis_000205000.1 adenylate kinase, putative
ingenoplastis_000205100.1 adenylate kinase 2
ingenoplastis_000205200.1 malate dehydrogenase
ingenoplastis_000205300.1 hypothetical protein, conserved
ingenoplastis_000205400.1 Domain of unknown function (DUF1935), putative
ingenoplastis_000205500.1 hypothetical protein
ingenoplastis_000205600.1 hypothetical protein
ingenoplastis_000205700.1 Domain of unknown function (DUF1935), putative
ingenoplastis_000205800.1 hypothetical protein
ingenoplastis_000205900.1 hypothetical protein
ingenoplastis_000206000.1 hypothetical protein
ingenoplastis_000206100.1 hypothetical protein, conserved
ingenoplastis_000206200.1 hypothetical protein, conserved
ingenoplastis_000206300.1 hypothetical protein
ingenoplastis_000206400.1 hypothetical protein
ingenoplastis_000206500.1 hypothetical protein, conserved
ingenoplastis_000206600.1 Domain of unknown function (DUF1935), putative
ingenoplastis_000206700.1 hypothetical protein
ingenoplastis_000206800.1 Domain of unknown function (DUF1935), putative
ingenoplastis_000206900.1 hypothetical protein
ingenoplastis_000207100.1 CS domain containing protein, putative
ingenoplastis_000207200.1 hypothetical protein, conserved
ingenoplastis_000207300.1 intraflagellar transport protein 81, putative
ingenoplastis_000207400.1 hypothetical protein
ingenoplastis_000207500.1 hypothetical protein
ingenoplastis_000207600.1 hypothetical protein
ingenoplastis_000207700.1 hypothetical protein, conserved
ingenoplastis_000207800.1 hypothetical protein, conserved
ingenoplastis_000207900.1 hypothetical protein, conserved
ingenoplastis_000208000.1 hypothetical protein, conserved
ingenoplastis_000208200.1 hypothetical protein
ingenoplastis_000208300.1 WD domain, G-beta repeat, putative
ingenoplastis_000208400.1 hypothetical protein, conserved
ingenoplastis_000208500.1 hypothetical protein, conserved
ingenoplastis_000208600.1 hypothetical protein
ingenoplastis_000208700.1 hypothetical protein
ingenoplastis_000208800.1 hypothetical protein, conserved
ingenoplastis_000208900.1 tRNA pseudouridine synthase, putative
ingenoplastis_000209000.1 Protein kinase domain/Protein tyrosine kinase/Kinase-like, putative
ingenoplastis_000209200.1 hypothetical protein
ingenoplastis_000209400.1 Protein kinase domain/Protein tyrosine kinase/Kinase-like, putative
ingenoplastis_000209600.1 ubiquitin ligase, putative
ingenoplastis_000209700.1 hypothetical protein, conserved
ingenoplastis_000209800.1 hypothetical protein, conserved
ingenoplastis_000209900.1 hypothetical protein, conserved
ingenoplastis_000210000.1 hypothetical protein, conserved
ingenoplastis_000210100.1 hypothetical protein, conserved
ingenoplastis_000210200.1 hypothetical protein, conserved
ingenoplastis_000210500.1 hypothetical protein, conserved
ingenoplastis_000210600.1 hypothetical protein, conserved
ingenoplastis_000210700.1 hypothetical protein, conserved
ingenoplastis_000210800.1 hypothetical protein, conserved
ingenoplastis_000210900.1 hypothetical protein, conserved
ingenoplastis_000211000.1 hypothetical protein, conserved
ingenoplastis_000211100.1 hypothetical protein
ingenoplastis_000211200.1 Got1/Sft2-like family, putative
ingenoplastis_000211300.1 hypothetical protein, conserved
ingenoplastis_000211400.1 hypothetical protein, conserved
ingenoplastis_000211500.1 hypothetical protein, conserved
ingenoplastis_000211600.1 hypothetical protein, conserved
ingenoplastis_000211700.1 hypothetical protein, conserved
ingenoplastis_000211800.1 hypothetical protein, conserved
ingenoplastis_000211900.1 hypothetical protein, conserved
ingenoplastis_000212000.1 hypothetical protein, conserved
ingenoplastis_000212100.1 hypothetical protein, conserved
ingenoplastis_000212200.1 hypothetical protein, conserved
ingenoplastis_000212300.1 hypothetical protein, conserved
ingenoplastis_000212400.1 hypothetical protein, conserved
ingenoplastis_000212500.1 hypothetical protein
ingenoplastis_000212600.1 hypothetical protein
ingenoplastis_000212800.1 BRCA1 C Terminus (BRCT) domain/twin BRCT domain containing protein, putative
ingenoplastis_000212900.1 haloacid dehalogenase-like hydrolase-like protein
ingenoplastis_000213000.1 haloacid dehalogenase-like hydrolase-like protein
ingenoplastis_000213100.1 hypothetical protein, conserved
ingenoplastis_000213200.1 Leucine Rich repeat, putative
ingenoplastis_000213300.1 DnaJ domain containing protein, putative
ingenoplastis_000213400.1 hypothetical protein, conserved
ingenoplastis_000213500.1 hypothetical protein, conserved
ingenoplastis_000213600.1 hypothetical protein, conserved
ingenoplastis_000213700.1 hypothetical protein, conserved
ingenoplastis_000213800.1 hypothetical protein, conserved
ingenoplastis_000213900.1 hypothetical protein, conserved
ingenoplastis_000214000.1 hypothetical protein, conserved
ingenoplastis_000214100.1 hypothetical protein, conserved
ingenoplastis_000214200.1 hypothetical protein, conserved
ingenoplastis_000214300.1 hypothetical protein, conserved
ingenoplastis_000214400.1 hypothetical protein, conserved
ingenoplastis_000214600.1 hypothetical protein, conserved
ingenoplastis_000214700.1 hypothetical protein, conserved
ingenoplastis_000214800.1 hypothetical protein, conserved
ingenoplastis_000215400.1 hypothetical protein, conserved
ingenoplastis_000215500.1 Core histone H2A/H2B/H3/H4, putative
ingenoplastis_000215600.1 histone H2B
ingenoplastis_000215700.1 hypothetical protein, conserved
ingenoplastis_000215800.1 hypothetical protein
ingenoplastis_000216200.1 histone H2B
ingenoplastis_000216300.1 histone H2B
ingenoplastis_000216400.1 histone H2B
ingenoplastis_000216500.1 histone H2B
ingenoplastis_000216600.1 histone H2B
ingenoplastis_000216800.1 histone H2B
ingenoplastis_000216900.1 histone H2B
ingenoplastis_000217000.1 hypothetical protein, conserved
ingenoplastis_000217500.1 arginase
ingenoplastis_000217600.1 hypothetical protein, conserved
ingenoplastis_000217700.1 hypothetical protein
ingenoplastis_000217800.1 hypothetical protein, conserved
ingenoplastis_000217900.1 structural maintenance of chromosome (SMC), putative
ingenoplastis_000218000.1 protein kinase, putative
ingenoplastis_000218100.1 microtubule-associated protein, putative
ingenoplastis_000218200.1 hypothetical protein
ingenoplastis_000218300.1 ATP-dependent RNA helicase, putative
ingenoplastis_000218400.1 trypanothione reductase
ingenoplastis_000218500.1 hypothetical protein, conserved
ingenoplastis_000218600.1 prostaglandin f2-alpha synthase/D-arabinose dehydrogenase
ingenoplastis_000218700.1 DNA replication licensing factor MCM8, putative
ingenoplastis_000218800.1 hypothetical protein
ingenoplastis_000218900.1 metallo-peptidase, Clan M-, Family M49
ingenoplastis_000219000.1 glutaminyl cyclase, putative
ingenoplastis_000219100.1 hypothetical protein
ingenoplastis_000219200.1 ubiquitin-conjugating enzyme E2, putative
ingenoplastis_000219300.1 paraflagellar rod protein, putative
ingenoplastis_000219400.1 hypothetical protein
ingenoplastis_000219500.1 hypothetical protein
ingenoplastis_000219600.1 hypothetical protein, conserved
ingenoplastis_000219700.1 Acid Phosphatase, putative
ingenoplastis_000219800.1 hypothetical protein
ingenoplastis_000219900.1 kinesin, putative
ingenoplastis_000220000.1 hypothetical protein, conserved
ingenoplastis_000220100.1 hypothetical protein
ingenoplastis_000220200.1 phosphoglycerate mutase, putative
ingenoplastis_000220300.1 glycerolphosphate mutase, putative
ingenoplastis_000220400.1 copper-transporting ATPase-like protein, putative
ingenoplastis_000220500.1 Heavy-metal-associated domain containing protein, putative
ingenoplastis_000220700.1 haloacid dehalogenase-like hydrolase, putative
ingenoplastis_000220800.1 E1-E2 ATPase, putative
ingenoplastis_000220900.1 hypothetical protein, conserved
ingenoplastis_000221000.1 hypothetical protein
ingenoplastis_000221100.1 mitogen-activated protein kinase, putative
ingenoplastis_000221300.1 hypothetical protein, conserved
ingenoplastis_000221400.1 hypothetical protein
ingenoplastis_000221500.1 hypothetical protein, conserved
ingenoplastis_000221600.1 hypothetical protein
ingenoplastis_000221800.1 hypothetical protein, conserved
ingenoplastis_000221900.1 RNA-binding protein 5, putative
ingenoplastis_000222000.1 hypothetical protein, conserved
ingenoplastis_000222100.1 hypothetical protein
ingenoplastis_000222200.1 phosphoribosylpyrophosphate synthetase, putative
ingenoplastis_000222300.1 Phosphate transport (Pho88), putative
ingenoplastis_000222400.1 ribosome assembly protein RRB1, putative
ingenoplastis_000222500.1 vesicular protein trafficking mediator, putative
ingenoplastis_000222600.1 LisH domain-containing protein FOPNL, putative
ingenoplastis_000222700.1 hypothetical protein, conserved
ingenoplastis_000222800.1 nucleolar GTP-binding protein, putative
ingenoplastis_000223000.1 hypothetical protein
ingenoplastis_000223100.1 hypothetical protein
ingenoplastis_000223300.1 hypothetical protein, conserved
ingenoplastis_000223400.1 short chain dehydrogenase, putative
ingenoplastis_000223500.1 short chain dehydrogenase, putative
ingenoplastis_000223600.1 short chain dehydrogenase, putative
ingenoplastis_000223700.1 short chain dehydrogenase, putative
ingenoplastis_000223800.1 short chain dehydrogenase, putative
ingenoplastis_000223900.1 hypothetical protein, conserved
ingenoplastis_000224000.1 6-phosphogluconolactonase
ingenoplastis_000224100.1 6-phosphogluconolactonase
ingenoplastis_000224200.1 6-phosphogluconolactonase
ingenoplastis_000224300.1 Alpha/beta hydrolase family/alpha/beta hydrolase fold, putative
ingenoplastis_000224400.1 proteasome regulatory non-ATPase subunit 11, putative
ingenoplastis_000224500.1 hypothetical protein, conserved
ingenoplastis_000224700.1 enoyl-[acyl-carrier-protein] reductase, putative
ingenoplastis_000224900.1 nuclear cap binding complex subunit CBP110, putative
ingenoplastis_000225000.1 Translation factor GUF1, mitochondrial, putative
ingenoplastis_000225100.1 hypothetical protein, conserved
ingenoplastis_000225200.1 hypothetical protein, conserved
ingenoplastis_000225300.1 hypothetical protein, conserved
ingenoplastis_000225400.1 hypothetical protein, conserved
ingenoplastis_000225500.1 hypothetical protein, conserved
ingenoplastis_000225600.1 Gamma-soluble NSF attachment protein (SNAP-gamma) (N-ethylmaleimide-sensitive factor attachment protein, gamma), putative
ingenoplastis_000225700.1 hypothetical protein, conserved
ingenoplastis_000225800.1 hypothetical protein
ingenoplastis_000225900.1 splicing factor ptsr1 interacting protein, putative
ingenoplastis_000226000.1 importin beta-1 subunit, putative
ingenoplastis_000226100.1 calcium channel protein, putative
ingenoplastis_000226200.1 WD domain, G-beta repeat, putative
ingenoplastis_000226300.1 ribosomal protein S25
ingenoplastis_000226400.1 hypothetical protein, conserved
ingenoplastis_000226500.1 Microtubule-binding stalk of dynein motor, putative
ingenoplastis_000226600.1 hypothetical protein, conserved
ingenoplastis_000226700.1 hypothetical protein, conserved
ingenoplastis_000227000.1 eukaryotic translation initiation factor 5, putative
ingenoplastis_000227100.1 hypothetical protein
ingenoplastis_000227300.1 START domain containing protein, putative
ingenoplastis_000227400.1 acyl-CoA binding protein, putative
ingenoplastis_000227500.1 hypothetical protein, conserved
ingenoplastis_000227600.1 oligopeptidase b
ingenoplastis_000227700.1 Domain of unknown function (DUF4464), putative
ingenoplastis_000227800.1 hypothetical protein
ingenoplastis_000227900.1 hypothetical protein
ingenoplastis_000228000.1 hypothetical protein
ingenoplastis_000228100.1 kinetoplast-associated protein-like protein
ingenoplastis_000228200.1 Prefoldin subunit, putative
ingenoplastis_000228300.1 hypothetical protein, conserved
ingenoplastis_000228400.1 DEAD/DEAH box helicase-like protein
ingenoplastis_000228500.1 Uncharacterised protein family (UPF0160), putative
ingenoplastis_000228600.1 ras family protein-like protein
ingenoplastis_000228700.1 hypothetical protein, conserved
ingenoplastis_000228800.1 histone h1-like protein
ingenoplastis_000228900.1 phospholipid transporting ATPase-like protein, putative
ingenoplastis_000229000.1 ubiquitin-fusion protein
ingenoplastis_000229100.1 ubiquitin-fusion protein
ingenoplastis_000229200.1 ef-hand protein 5, putative
ingenoplastis_000229300.1 calmodulin, putative
ingenoplastis_000229400.1 calmodulin, putative
ingenoplastis_000229500.1 calmodulin, putative
ingenoplastis_000229600.1 calmodulin, putative
ingenoplastis_000229700.1 calmodulin, putative
ingenoplastis_000229800.1 calmodulin, putative
ingenoplastis_000229900.1 translation-associated element 2, putative
ingenoplastis_000230000.1 SLA/LP autoantigen-like protein
ingenoplastis_000230100.1 hypothetical protein, conserved
ingenoplastis_000230200.1 elongation factor-1 gamma
ingenoplastis_000230900.1 elongation factor-1 gamma
ingenoplastis_000231000.1 Elongation factor 1 gamma, conserved domain containing protein, putative
ingenoplastis_000231100.1 Glutathione S-transferase, N-terminal domain/Glutathione S-transferase, C-terminal domain containing protein, putative
ingenoplastis_000231300.1 Elongation factor 1 gamma, conserved domain containing protein, putative
ingenoplastis_000231400.1 Glutathione S-transferase, N-terminal domain/Glutathione S-transferase, C-terminal domain containing protein, putative
ingenoplastis_000231500.1 hypothetical protein, conserved
ingenoplastis_000231600.1 hypothetical protein
ingenoplastis_000231700.1 hypothetical protein, conserved
ingenoplastis_000231800.1 hypothetical protein
ingenoplastis_000232300.1 hypothetical protein, conserved
ingenoplastis_000232400.1 Zinc finger C-x8-C-x5-C-x3-H type (and similar), putative
ingenoplastis_000232500.1 hypothetical protein
ingenoplastis_000232600.1 phospholipid:diacylglycerol acyltransferase, putative
ingenoplastis_000232700.1 MSP (Major sperm protein) domain containing protein, putative
ingenoplastis_000232800.1 DNA-directed RNA polymerase III subunit, putative
ingenoplastis_000233000.1 hypothetical protein
ingenoplastis_000233100.1 hypothetical protein, conserved
ingenoplastis_000233200.1 mitochondrial RNA binding protein 2
ingenoplastis_000233300.1 mitochondrial import inner membrane translocase subunit TIM17, putative
ingenoplastis_000233400.1 hypothetical protein, conserved
ingenoplastis_000233500.1 hypothetical protein, conserved
ingenoplastis_000233600.1 hypothetical protein, conserved
ingenoplastis_000233700.1 hypothetical protein, conserved
ingenoplastis_000233800.1 hypothetical protein
ingenoplastis_000233900.1 hypothetical protein
ingenoplastis_000234000.1 Zinc finger, C3HC4 type (RING finger) containing protein, putative
ingenoplastis_000234100.1 AAA family ATPase, putative
ingenoplastis_000234200.1 ATP-dependent helicase, putative
ingenoplastis_000234300.1 Bromodomain, putative
ingenoplastis_000234400.1 ATP-dependent helicase, putative
ingenoplastis_000234500.1 hypothetical protein, conserved
ingenoplastis_000234600.1 Right handed beta helix region/Periplasmic copper-binding protein (NosD), putative
ingenoplastis_000234700.1 mitochondrial carrier protein, putative
ingenoplastis_000234800.1 hypothetical protein, conserved
ingenoplastis_000234900.1 hypothetical protein, conserved
ingenoplastis_000235000.1 PPPDE putative peptidase domain containing protein, putative
ingenoplastis_000235100.1 hypothetical protein
ingenoplastis_000235200.1 paraflagellar rod component, putative
ingenoplastis_000235300.1 cyclophilin type peptidyl-prolyl cis-trans isomerase
ingenoplastis_000235400.1 hypothetical protein
ingenoplastis_000235500.1 hypothetical protein, conserved
ingenoplastis_000235600.1 SET domain containing protein, putative
ingenoplastis_000235700.1 hypothetical protein
ingenoplastis_000235800.1 ubiquinone biosynthesis protein-like protein, putative
ingenoplastis_000235900.1 hypothetical protein
ingenoplastis_000236000.1 Rhodanese-like domain containing protein, putative
ingenoplastis_000236200.1 cytochrome b5-like protein, putative
ingenoplastis_000236600.1 hypothetical protein, conserved
ingenoplastis_000236700.1 hypothetical protein, conserved
ingenoplastis_000236900.1 amino acid transporter aATP11, putative
ingenoplastis_000237000.1 Tryptophan/tyrosine permease family/Transmembrane amino acid transporter protein, putative
ingenoplastis_000237100.1 Tryptophan/tyrosine permease family/Transmembrane amino acid transporter protein, putative
ingenoplastis_000237200.1 Tryptophan/tyrosine permease family/Transmembrane amino acid transporter protein, putative
ingenoplastis_000237400.1 hypothetical protein, conserved
ingenoplastis_000237500.1 hypothetical protein, conserved
ingenoplastis_000237600.1 hypothetical protein, conserved
ingenoplastis_000237700.1 hypothetical protein, conserved
ingenoplastis_000237800.1 hypothetical protein, conserved
ingenoplastis_000237900.1 hypothetical protein, conserved
ingenoplastis_000238000.1 hypothetical protein, conserved
ingenoplastis_000238100.1 hypothetical protein, conserved
ingenoplastis_000238200.1 hypothetical protein, conserved
ingenoplastis_000238300.1 hypothetical protein, conserved
ingenoplastis_000238400.1 hypothetical protein, conserved
ingenoplastis_000238500.1 hypothetical protein, conserved
ingenoplastis_000238600.1 Reverse transcriptase (RNA-dependent DNA polymerase), putative
ingenoplastis_000238700.1 hypothetical protein, conserved
ingenoplastis_000238900.1 hypothetical protein, conserved
ingenoplastis_000239200.1 hypothetical protein, conserved
ingenoplastis_000239300.1 hypothetical protein, conserved
ingenoplastis_000239400.1 hypothetical protein, conserved
ingenoplastis_000239600.1 clathrin coat assembly protein, putative
ingenoplastis_000239700.1 clathrin coat assembly protein, putative
ingenoplastis_000239800.1 cystathionine beta-lyase-like protein
ingenoplastis_000239900.1 Serpin (serine protease inhibitor), putative
ingenoplastis_000240000.1 Serpin (serine protease inhibitor), putative
ingenoplastis_000240100.1 N-terminal conserved domain of Nudc./CS domain containing protein, putative
ingenoplastis_000240200.1 hypothetical protein, conserved
ingenoplastis_000240300.1 hypothetical protein, conserved
ingenoplastis_000240400.1 hypothetical protein, conserved
ingenoplastis_000240500.1 Iguana/Dzip1-like DAZ-interacting protein N-terminal, putative
ingenoplastis_000240600.1 Protein of unknown function (DUF1253), putative
ingenoplastis_000240700.1 hypothetical protein
ingenoplastis_000240800.1 hypothetical protein
ingenoplastis_000240900.1 hypothetical protein, conserved
ingenoplastis_000241000.1 hypothetical protein
ingenoplastis_000241100.1 hypothetical protein
ingenoplastis_000241200.1 hypothetical protein, conserved
ingenoplastis_000241300.1 Plasma-membrane choline transporter, putative
ingenoplastis_000241400.1 hypothetical protein, conserved
ingenoplastis_000241500.1 p25-alpha, putative
ingenoplastis_000241600.1 p25-alpha, putative
ingenoplastis_000241700.1 p25-alpha, putative
ingenoplastis_000241800.1 p25-alpha, putative
ingenoplastis_000241900.1 p25-alpha, putative
ingenoplastis_000242000.1 hypothetical protein
ingenoplastis_000242100.1 ATP dependent DEAD-box helicase, putative
ingenoplastis_000242200.1 Sugar (and other) transporter, putative
ingenoplastis_000242300.1 Glycosyl hydrolase family 3 N terminal domain/Glycosyl hydrolase family 3 C-terminal domain/Fibronectin type III-like domain containing protein, putative
ingenoplastis_000242400.1 Glycosyl hydrolase family 3 N terminal domain containing protein, putative
ingenoplastis_000242500.1 Glycosyl hydrolase family 3 C-terminal domain/Fibronectin type III-like domain containing protein, putative
ingenoplastis_000242600.1 Glycosyl hydrolase family 3 N terminal domain containing protein, putative
ingenoplastis_000242700.1 Glycosyl hydrolase family 3 N terminal domain/Glycosyl hydrolase family 3 C-terminal domain/Fibronectin type III-like domain containing protein, putative
ingenoplastis_000242800.1 ubiquitin-conjugating enzyme E2, putative
ingenoplastis_000242900.1 hypothetical protein, conserved
ingenoplastis_000243000.1 hypothetical protein
ingenoplastis_000243100.1 hypothetical protein, conserved
ingenoplastis_000243200.1 hypothetical protein, conserved
ingenoplastis_000243300.1 Bromodomain, putative
ingenoplastis_000243400.1 threonine synthase, putative
ingenoplastis_000243500.1 inositol polyphosphate kinase-like protein, putative
ingenoplastis_000243600.1 hypothetical protein
ingenoplastis_000243700.1 hypothetical protein
ingenoplastis_000243800.1 hypothetical protein
ingenoplastis_000243900.1 hypothetical protein
ingenoplastis_000244000.1 proteasome alpha 3 subunit, putative
ingenoplastis_000244200.1 hypothetical protein, conserved
ingenoplastis_000244300.1 hypothetical protein, conserved
ingenoplastis_000244400.1 hypothetical protein, conserved
ingenoplastis_000244500.1 Scavenger mRNA decapping enzyme C-term binding/HIT domain/Protein similar to CwfJ C-terminus 1, putative
ingenoplastis_000244600.1 hypothetical protein, conserved
ingenoplastis_000244700.1 PX domain containing protein, putative
ingenoplastis_000244800.1 Domain of unknown function (DUF4201), putative
ingenoplastis_000244900.1 Redoxin/AhpC/TSA family/Thioredoxin-like, putative
ingenoplastis_000245000.1 hypothetical protein
ingenoplastis_000245100.1 hypothetical protein
ingenoplastis_000245200.1 60S ribosomal protein, putative
ingenoplastis_000245400.1 hypothetical protein, conserved
ingenoplastis_000245500.1 hypothetical protein, conserved
ingenoplastis_000245600.1 DnaJ domain containing protein, putative
ingenoplastis_000245700.1 hypothetical protein, conserved
ingenoplastis_000245800.1 DnaJ domain containing protein, putative
ingenoplastis_000245900.1 hypothetical protein
ingenoplastis_000246000.1 hypothetical protein, conserved
ingenoplastis_000246100.1 ADP-ribosylation factor family, putative
ingenoplastis_000246500.1 hypothetical protein, conserved
ingenoplastis_000246600.1 hypothetical protein, conserved
ingenoplastis_000246700.1 hypothetical protein, conserved
ingenoplastis_000246800.1 hypothetical protein, conserved
ingenoplastis_000246900.1 hypothetical protein, conserved
ingenoplastis_000247000.1 hypothetical protein, conserved
ingenoplastis_000247100.1 hypothetical protein, conserved
ingenoplastis_000247300.1 hypothetical protein, conserved
ingenoplastis_000247400.1 Plasma-membrane choline transporter, putative
ingenoplastis_000247500.1 p25-alpha, putative
ingenoplastis_000247600.1 p25-alpha, putative
ingenoplastis_000247700.1 p25-alpha, putative
ingenoplastis_000247800.1 hypothetical protein, conserved
ingenoplastis_000247900.1 protein kinase, putative
ingenoplastis_000248000.1 hypothetical protein, conserved
ingenoplastis_000248100.1 hypothetical protein, conserved
ingenoplastis_000248200.1 hypothetical protein, conserved
ingenoplastis_000248300.1 hypothetical protein
ingenoplastis_000248400.1 hypothetical protein
ingenoplastis_000248500.1 hypothetical protein
ingenoplastis_000248600.1 hypothetical protein, conserved
ingenoplastis_000248700.1 hypothetical protein
ingenoplastis_000248800.1 hypothetical protein, conserved
ingenoplastis_000248900.1 voltage-dependent anion-selective channel, putative
ingenoplastis_000249000.1 hypothetical protein
ingenoplastis_000249100.1 Mitochondrial protein 81
ingenoplastis_000249200.1 ubiquitin-conjugating enzyme E2, putative
ingenoplastis_000249300.1 MORN repeat, putative
ingenoplastis_000249400.1 FtsJ-like methyltransferase, putative
ingenoplastis_000249500.1 proteasome regulatory non-ATPase subunit 6, putative
ingenoplastis_000249700.1 RNase PH-like protein, putative
ingenoplastis_000249800.1 Soluble NSF attachment protein, SNAP, putative
ingenoplastis_000249900.1 NIMA/Nek Serine/threonine-protein kinase family, putative
ingenoplastis_000250100.1 Glycosyltransferase (GlcNAc), putative
ingenoplastis_000250200.1 hypothetical protein
ingenoplastis_000250300.1 Ankyrin repeat, putative
ingenoplastis_000250400.1 Zinc finger, C3HC4 type (RING finger) containing protein, putative
ingenoplastis_000250500.1 phosphatidylinositol kinase related protein, putative
ingenoplastis_000250600.1 hypothetical protein, conserved
ingenoplastis_000250700.1 tRNA exportin, putative
ingenoplastis_000250800.1 hypothetical protein, conserved
ingenoplastis_000250900.1 hypothetical protein, conserved
ingenoplastis_000251000.1 cytochrome b-domain protein, putative
ingenoplastis_000251100.1 peroxisome targeting signal 1 receptor, putative
ingenoplastis_000251200.1 Histidine phosphatase superfamily (branch 2), putative
ingenoplastis_000251300.1 Predicted AAA-ATPase, putative
ingenoplastis_000251400.1 Predicted AAA-ATPase, putative
ingenoplastis_000251500.1 Protein of unknown function (DUF1703), putative
[truncated: 7,602 more rows]
